1 **Anteroposterior patterning of the zebrafish ear through Fgf- and Hh-dependent**  
2 **regulation of *hmx3a* expression**

3

4 Ryan D. Hartwell<sup>1,\*</sup>, Samantha J. England<sup>2,\*</sup>, Nicholas A. M. Monk<sup>3,\*</sup>, Nicholas J. van  
5 Hateren<sup>1</sup>, Sarah Baxendale<sup>1</sup>, Mar Marzo<sup>1</sup>, Katharine E. Lewis<sup>2</sup> and Tanya T.  
6 Whitfield<sup>1,#</sup>

7

8 <sup>1</sup>Bateson Centre and Department of Biomedical Science, University of Sheffield,  
9 Sheffield, S10 2TN, UK

10 <sup>2</sup>Department of Biology, Syracuse University, Syracuse, NY 13244, USA

11 <sup>3</sup>School of Mathematics and Statistics, University of Sheffield, Sheffield, S3 7RH, UK

12

13 \*These authors contributed equally

14

15 #Corresponding author:

16 Tanya T. Whitfield: [t.whitfield@sheffield.ac.uk](mailto:t.whitfield@sheffield.ac.uk)

17 ORCID iD: 0000-0003-1575-1504

18

19 **Key words:** zebrafish, otic vesicle, Fgf, Hh, *fgf3*, *fgf8a*, *fgf10a*, *hmx3a*, *hmx2*, *pax5*,  
20 mirror-image duplication

21

22

23 **Abstract**

24 In the zebrafish, Fgf and Hh signalling assign anterior and posterior identity,  
25 respectively, to the poles of the developing ear. Mis-expression of *fgf3* or inhibition of  
26 Hh signalling results in double-anterior ears, including ectopic expression of *hmx3a*.  
27 To understand how this double-anterior pattern is established, we characterised  
28 transcriptional responses in Fgf gain-of-signalling or Hh loss-of-signalling  
29 backgrounds. Mis-expression of *fgf3* resulted in rapid expansion of anterior otic  
30 markers, refining over time to give the duplicated pattern. Response to Hh inhibition  
31 was very different: initial anteroposterior asymmetry was retained, with de novo  
32 duplicate expression domains appearing later. We show that Hmx3a is required for  
33 normal anterior otic patterning, but neither loss nor gain of *hmx3a* function was  
34 sufficient to generate ear duplications. Using our data to infer a transcriptional  
35 regulatory network required for acquisition of otic anterior identity, we can  
36 recapitulate both the wild-type and the double-anterior pattern in a mathematical  
37 model.

38

39

## 40 Introduction

41 The otic placode—precursor of the vertebrate inner ear—has the remarkable ability  
42 to generate a mirror-image organ with duplicate structures under some experimental  
43 conditions in fish and amphibians, as originally described by R. G. Harrison over  
44 eighty years ago (reviewed in (Whitfield and Hammond, 2007)). Understanding the  
45 generation of such duplicated structures can give us fundamental insights into  
46 mechanisms of organ patterning, tissue polarity and symmetry-breaking during  
47 embryogenesis. During normal development in the zebrafish, anteroposterior  
48 asymmetries in otic gene expression are evident as early as the 4-somite stage (11.5  
49 hours post fertilisation (hpf)), when expression of the transcription factor gene *hmx3a*  
50 appears at the anterior of the otic placode (Feng and Xu, 2010). Additional genes  
51 with predominantly anterior patterns of expression in the otic placode or vesicle begin  
52 to be expressed over the next 10 hours, including the transcription factor genes *hmx2*  
53 and *pax5* (Feng and Xu, 2010; Kwak et al., 2006), together with the fibroblast growth  
54 factor (Fgf) family genes *fgf3*, *fgf8a* and *fgf10a* (Léger and Brand, 2002; McCarroll  
55 and Nechiporuk, 2013). Later, at otic vesicle stages (24 hpf onwards), the size and  
56 position of the otoliths, together with the position, shape and planar polarity patterns  
57 of the sensory maculae, provide landmarks for distinguishing anterior and posterior  
58 structures in the ear (Hammond and Whitfield, 2011) (Fig. 1). In addition, a few  
59 markers begin to be expressed specifically in posterior otic tissue (*pou3f3b*, *bmp7a*  
60 and *fsta*) at otic vesicle stages (Kwak et al., 2006; Mowbray et al., 2001; Schmid et  
61 al., 2000), but these are not reliable posterior markers at earlier otic placode stages.

62

63 Concomitant with the appearance of anteroposterior asymmetry in the zebrafish otic  
64 domain, other early patterning events occur that are symmetrical about the  
65 anteroposterior axis. Of relevance for our study, a single sensory-competent domain,  
66 marked by the expression of *atoh1b*, splits into two domains, one at each pole of the  
67 ear, by 12 hpf. This process is dependent on Notch signalling and *atoh1b* function,  
68 and defines differences between the poles of the otic placode and a central zone  
69 (Millimaki et al., 2007). The two poles express various markers symmetrically,  
70 including *atoh1a* and *deltaD*, between 14–18 hpf (Millimaki et al., 2007), presaging  
71 the appearance of pairs of *myo7aa*-positive sensory hair cells (tether cells) at each  
72 pole by 18–24 hpf (Ernest et al., 2000). Thus, by the completion of otic induction at  
73 14 hpf (10 somites), the otic domain has two clear poles defined by the symmetric  
74 expression of *atoh1a* and *deltaD*, with the anterior pole distinguished from the  
75 posterior by the asymmetric expression of *hmx3a*.

76

77 Although anteroposterior asymmetries in otic gene expression are already apparent  
78 by 12 hpf in the zebrafish, these can be disrupted by interfering with extrinsic  
79 signalling pathway activity after this time. For example, manipulations of either  
80 Fibroblast growth factor (Fgf) or Hedgehog (Hh) signalling between 14-19 hpf can  
81 result in striking double-anterior or double-posterior mirror-image ears. Fgf signalling  
82 is both required and sufficient to act as an anteriorising cue, whereas Hh signalling is  
83 both required and sufficient for the acquisition of posterior otic identity (Hammond et  
84 al., 2003; Hammond et al., 2010; Hammond and Whitfield, 2011). In these studies,  
85 we showed that transient *fgf3* mis-expression at 14 hpf or Hh pathway loss-of-  
86 function result in the loss of posterior-specific expression domains of *fsta* at 30 hpf  
87 and *otx1b* at 45–48 hpf, and the gain of anterior-specific gene expression in the  
88 posterior of the ear (*hmx2* and *pax5* at 24 hpf after *fgf3* mis-expression; *hmx3a* at 30  
89 hpf in Hh loss-of-function mutants). These findings suggest that Fgf and Hh  
90 signalling normally act to establish and determine the asymmetric expression of  
91 marker genes within the otic epithelium. However, the details of their temporal mode  
92 of action in the duplication of anterior otic fates have not been explored.

93

94 In this study, we have compared the dynamics of the transcriptional responses that  
95 precede the acquisition of a duplicated anterior otic fate in an Fgf gain-of-signalling or  
96 a Hh loss-of-signalling context. Although the final duplicated ear structures appear  
97 similar after each manipulation, the early transcriptional responses differ for each  
98 signalling pathway, progressing in distinct ways to give rise to the double-anterior  
99 pattern at larval stages. One gene that shows an early transcriptional response in  
100 the zebrafish otic placode to disruption of either Fgf or Hh signalling is the *Hmx* family  
101 homeobox gene *hmx3a*. We have examined the effects of both loss-of-function and  
102 gain-of-function of *hmx3a* on inner ear patterning. Our data suggest that *hmx3a* is a  
103 key early target for the otic anteriorising activity of Fgf signalling, and that the function  
104 of *hmx3a* is required for the anterior-specific otic expression of *fgf3* and *pax5*,  
105 together with correct positioning and development of the sensory maculae. However,  
106 unlike high Fgf levels or low Hh pathway activity, mis-expression of *hmx3a* was  
107 unable to generate full duplications of anterior character at the posterior of the ear. A  
108 mathematical model based on our experimental findings can recapitulate both the  
109 wild-type and duplicated anterior pattern, allowing us to explore the dynamical  
110 principles underlying the generation of a mirror-image duplicated organ system.

111

112 **Results**

113 **Early mis-expression of *fgf3*, but not *fgf8a*, can generate complete double-**  
114 **anterior ear duplications**

115 To establish optimal conditions for generating a double-anterior ear in the zebrafish  
116 embryo, we compared otic phenotypes in transgenic lines for two different *fgf* genes,  
117 *fgf3* and *fgf8a*, with systemic transgene expression driven under the control of the  
118 *hsp70* heat-shock promoter (Lecaudey et al., 2008; Millimaki et al., 2010).

119 Previously, we showed that a 2-hour heat shock in the *Tg(hsp70:fgf3)* line at 14 hpf  
120 (10-somite stage) resulted in a robust duplication of anterior otic structures  
121 (Hammond and Whitfield, 2011). We chose this time point to avoid any interference  
122 with otic placode induction, which is also Fgf-dependent, but is complete by 14 hpf  
123 (Kimmel et al., 1995; Phillips et al., 2001). The 14 hpf time point is also after  
124 completion of the Notch-dependent signalling event that distinguishes the otic poles  
125 from a central zone of epithelium (Millimaki et al., 2007). For the treatments  
126 described here, we reduced the time of heat shock to 30 minutes at 39°C. This  
127 shorter heat shock still results in a full ear duplication, but should minimise effects of  
128 Fgf mis-expression on other developing organ systems. After heat shock, embryos  
129 were then cultured at 33°C for a further 30 minutes, to reduce the incubation  
130 temperature gradually, before being returned to 28.5°C and incubated until 3 days  
131 post fertilisation (dpf) for processing and analysis (Fig. 1). This stepwise reduction in  
132 temperature is thought to extend transgene activation and reduce cell death following  
133 heat shock (Padanad et al., 2012; Zou et al., 1998). Non-transgenic sibling embryos,  
134 subjected to the same heat-shock treatment, served as controls (Fig. 1—  
135 [Supplemental file 1](#)).

136

137 In *Tg(hsp70:fgf3)* embryos, a 30-minute heat shock at 14 hpf gave a robust and  
138 complete duplication of anterior otic patterning at 72 hpf, as indicated by the mis-  
139 positioning or fusion of the posterior otolith, loss of posterior elements of the saccular  
140 macula, and a duplication of anterior (utricle)-like sensory elements on the  
141 posteroventral floor of the ear (Fig. 1B,G,G'). The phenotypes seen after mis-  
142 expression of *fgf8a* (30-minute heat shock at 14 hpf) were milder and more variable  
143 than those for *fgf3*, and included a split and mis-positioned saccular macula rather  
144 than a complete duplication of anterior elements (Fig. 1C,H), and a normal  
145 complement of three cristae (Fig. 1H'). A 30-minute heat shock of either transgenic  
146 line at a later stage (18 hpf) resulted in only mild effects on ear size and shape, and  
147 otolith position (Fig. 1—[Supplemental file 2A–D](#)) (Hammond and Whitfield, 2011).  
148 We therefore chose to use the *Tg(hsp70:fgf3)* line, with a 30-minute heat shock

149 (39°C) at 14 hpf followed by 30 minutes at 33°C, in subsequent heat-shock  
150 experiments.

151

152 **Genetic or pharmacological inhibition of Hh signalling can also result in**  
153 **complete double-anterior ear duplications**

154 To optimise our protocols for generating double-anterior duplicated ears through  
155 inhibition of Hh signalling, we first examined the ear phenotype in *smo*<sup>hi1640Tg/hi1640Tg</sup>  
156 mutants. The *hi1640Tg* allele (a transgenic insertion in the *smoothened* gene, and a  
157 likely null (Chen et al., 2001)) is thought to result in a stronger reduction in Hh  
158 signalling than the point mutation alleles *smo*<sup>b641</sup> and *smo*<sup>b577</sup>, both of which predict  
159 single amino acid substitutions (Varga et al., 2001), and which we used in previous  
160 studies (Hammond et al., 2003; Hammond and Whitfield, 2011). The  
161 *smo*<sup>hi1640Tg/hi1640Tg</sup> mutants showed a fully penetrant double-anterior duplicated ear  
162 phenotype, with two similar-sized small otoliths located ventrally, complete loss of the  
163 posterior (saccular) macula, and duplication of the anterior (utricle) macula at the  
164 posterior of the ear, with anterior and posterior elements sometimes present as a  
165 contiguous patch of hair cells covering the ventral floor (Fig. 1D,I). Four cristae,  
166 rather than the usual three, were present in all (8/8) mutant ears imaged (Fig. 1I').  
167 (For comparison, four cristae were present in only about 50% of ears of *smo*<sup>b641/b641</sup>  
168 mutant embryos (Hammond et al., 2003).)

169

170 Pharmacological inhibition of the transducer of the Hh pathway, *Smoothened*, using  
171 the small molecule cyclopamine, can also produce double-anterior ear duplications  
172 (Hammond et al., 2010; Sapède and Pujades, 2010). This approach enables a  
173 conditional inhibition of Hh signalling over a defined time window. For the  
174 experiments described here, we treated wild-type embryos with 100 µM cyclopamine  
175 from 14–22.5 hpf. To examine later stages, we washed out the cyclopamine at 22.5  
176 hpf and allowed embryos to develop further until 3 dpf (72 hpf), when they were fixed  
177 for staining and imaging. Stage-matched sibling embryos—either untreated, or  
178 treated with vehicle (ethanol) only—served as controls. This cyclopamine treatment  
179 regime was sufficient to generate the double-anterior ear phenotype, characterised  
180 by two ventrally-positioned, small (utricle-like) otoliths, loss of the posterior  
181 (saccular) macula, and a clear duplication of the anterior (utricle) macula (Fig.  
182 1E,J). Ears in 4/8 treated embryos had four cristae (Fig. 1J'); the remaining 4/8 had  
183 the normal complement of three cristae. The size and shape of the ear were less  
184 affected than in the *smo*<sup>hi1640Tg/hi1640Tg</sup> mutant embryos, presumably due to the  
185 transient nature of the cyclopamine treatment. Taken together, these data show that

186 either genetic or pharmacological inhibition of Hh signalling in wild-type zebrafish  
187 embryos between 14–22.5 hpf results in a robust and reproducible double-anterior  
188 ear phenotype at 3 dpf.

189

190 **Following early *fgf3* mis-expression, otic expression of anterior markers is**  
191 **initially broad, with *pax5* resolving into two discrete domains**

192 One of the most striking transcriptional changes in response to *fgf3* mis-expression is  
193 the expansion or duplication of the expression of the anterior otic markers *hmx2* and  
194 *pax5* by 24 hpf (Hammond and Whitfield, 2011). To examine the temporal dynamics  
195 of this transcriptional response, we assayed for expression of these and additional  
196 anterior otic marker genes following our optimised ‘early’ heat-shock regime (14 hpf,  
197 30 min, 39°C) at three different time points: 16 hpf (2 hours post heat shock, to  
198 examine any rapid response), 22.5 hpf (8.5 hours post heat shock, when anterior otic  
199 expression of *hmx2* and *pax5* is strongly established in wild-type embryos) and 36  
200 hpf (22 hours post heat shock, to examine whether any disruption to the expression  
201 pattern resolves or changes over time). For *hmx2* and *pax5*, which showed dynamic  
202 expression changes, we subsequently included two additional time points (25.5 hpf  
203 and 30 hpf) to capture these changes in more detail.

204

205 We first tested expression of three genes coding for transcription factors (*hmx3a*,  
206 *hmx2* and *pax5*; Fig. 2). At the earliest time point (16 hpf, two hours after heat  
207 shock), *hmx3a* showed the strongest response: expression had already expanded to  
208 cover the entire anteroposterior extent of the otic placode (Fig. 2A,B). The anterior  
209 markers *hmx2* and *pax5*, not normally expressed at this stage in wild-type embryos,  
210 were expressed at very low levels in the anterior of the otic placode of heat-shocked  
211 embryos (Fig. 2C–F). We were also able to detect widespread and robust up-  
212 regulation of the Fgf target gene *etv4* (formerly *pea3*) in transgenic embryos at this  
213 time point (Fig. 2—Supplemental file 1). By 22.5 hpf, all three transcription factor  
214 genes were strongly expressed in a broad zone across the entire anteroposterior axis  
215 of the otic vesicle in heat-shocked embryos, on the medial side, as can be seen in a  
216 dorsal view (Fig. 2G–L). Note that the overall size and shape of these otic vesicles  
217 were relatively normal. Although there was some variability (including between both  
218 ears of the same fish), the vesicles were oval in shape, indicating that otic induction  
219 had not been compromised (compare with the small, rounded vesicles of *fgf8a*<sup>ti282/ti282</sup>  
220 mutants, in which otic induction is disrupted (Léger and Brand, 2002)). By 36 hpf,  
221 wild-type otic expression of *hmx* genes was more complex, but a clear difference  
222 between anterior expressing and posterior non-expressing regions was evident in



223 ventral otic epithelium (Fig. 2M,M',O,O'). By contrast, in heat-shocked embryos,  
224 expression of *hmx3a* remained strong across the entire anteroposterior axis of the  
225 ear in ventral regions (Fig. 2N,N'); expression of *hmx2* weakened in central regions  
226 during intermediate stages, but at 36 hpf was present in a contiguous ventral domain  
227 (Fig. 2P,P', Fig. 2—Supplemental File 2), while expression of *pax5* was lost in central  
228 regions, resolving into two discrete ventral domains at the anterior and posterior  
229 poles by 25.5 hpf (Fig. 2R,R', Fig. 2—Supplemental File 3).

230

231 To test whether the milder ear phenotype caused by a later heat shock reflects a  
232 failure to establish the early transcriptional responses described above, we also  
233 examined expression of anterior markers in *Tg(hsp70:fgf3)* embryos after heat shock  
234 at 18 hpf (30 min, 39°C). Unexpectedly, we found that the otic expression of *hmx3a*  
235 and *pax5* was very similar to that following an early (14 hpf) heat shock, with a broad  
236 band of ectopic expression extending across the entire anteroposterior axis of the  
237 otic vesicle by 22.5 hpf (Fig. 1—Supplemental file 2E–H'). This suggests that the  
238 loss of competence to generate a complete double-anterior ear after a late heat  
239 shock is not due to an inability to express *hmx3a* and *pax5* ectopically throughout the  
240 otic epithelium at otic vesicle stages.

241

#### 242 **Inhibition of Hh signalling results in a slower and spatially distinct** 243 **transcriptional response in the otic vesicle**

244 To compare the transcriptional response after *fgf3* mis-expression at 14 hpf with that  
245 following conditional Hh pathway inhibition from the same time point, we examined  
246 otic expression of anterior marker genes after treatment of wild-type embryos with  
247 cyclopamine (100 µM, 14–22.5 hpf; Fig. 3). To confirm the efficacy of cyclopamine  
248 treatment, we also examined the expression of *ptch2*, a known target of Hh  
249 signalling. Expression of *ptch2* was down-regulated throughout the embryo at 22.5  
250 hpf, but not abolished (Fig. 3—Supplemental file 1). (By contrast, *ptch2* expression  
251 is almost entirely lost at 24 hpf in *smo<sup>hi1640Tg/hi1640Tg</sup>* mutants (Chen et al., 2001)). We  
252 also checked expression of *etv4* following cyclopamine treatment, but found no major  
253 changes in expression at 22.5 hpf (Fig. 3—Supplemental file 1). This result  
254 confirmed that there are no strong direct effects of the transient inhibition of the Hh  
255 pathway on Fgf signalling activity in the ear, in line with our previous findings after  
256 genetic abrogation of Hh signalling (Hammond and Whitfield, 2011).

257

258 We examined otic marker genes at two different time points following cyclopamine  
259 treatment (22.5 hpf and 36 hpf). Otic expression of both *hmx3a* and *hmx2* was



260 expanded posteriorly on the medial side of the otic vesicle at 22.5 hpf, 8.5 hours after  
261 the start of the treatment (Fig. 3A-D'; Fig. 3—Supplemental file 2). Expanded otic  
262 *hmx* gene expression was also present by 23 hpf in the *smo*<sup>hi1640Tg/hi1640Tg</sup> mutant, in  
263 which the Hh pathway is constitutively inactive (Fig. 3—Supplemental file 2).  
264 Importantly, there was no significant difference in the expansion of *hmx3a* expression  
265 in the ear at 22.5–23 hpf between the *smo* mutants and cyclopamine-treated  
266 embryos, indicating that our cyclopamine treatment regime is effective at suppressing  
267 Hh signalling relevant to otic patterning at this stage (Fig. 3—Supplemental file 2).

268

269 The spatial pattern of *hmx* expansion in response to Hh inhibition was different to that  
270 seen after mis-expression of *fgf3*. Specifically, in cyclopamine-treated embryos or  
271 *smo*<sup>hi1640Tg/hi1640Tg</sup> mutants, *hmx3a* and *hmx2* were expressed in a graded fashion  
272 across the ear at 22.5 hpf (8.5 hours after treatment), with higher levels anteriorly,  
273 rather than in a uniform broad band (compare Fig. 3B with Fig. 2H). To examine  
274 later time points, treated embryos were transferred to fresh medium at 22.5 hpf  
275 without cyclopamine, as described above. By 36 hpf (13.5 hours post wash),  
276 expression of *hmx* genes had expanded further posteriorly to cover most of the  
277 ventral floor of the otic vesicle in cyclopamine-treated embryos (Fig. 3G-J'), as  
278 observed previously at 30 hpf in *con*<sup>tf18b/tf18b</sup> and *smo*<sup>b641/b641</sup> mutants, both of which  
279 have a strong reduction in Hh signalling (Hammond et al., 2003).

280

281 Expression of *pax5* was slower to respond following cyclopamine-mediated inhibition  
282 of Hh signalling, with no apparent expansion of the expression domain within the otic  
283 vesicle at 22.5 hpf (Fig. 3E-F'). These results corroborate our previous observations  
284 in *con*<sup>tf18b/tf18b</sup> and *smo*<sup>b641/b641</sup> mutants, where there was little change in the otic  
285 expression of *pax5* at 24 hpf (Hammond et al., 2003). However, by the later time  
286 point (36 hpf; 13.5 hours post wash), a new, discrete domain of *pax5* expression  
287 appeared within posteromedial otic epithelium of cyclopamine-treated embryos (Fig.  
288 3K,L). Anteroposterior asymmetry in treated ears was still evident at this stage: the  
289 posterior domain of expression was weaker, and in a more medial position, than the  
290 anterior expression domain (Fig. 3K,L). However, the epithelium in posteroventral  
291 regions was thicker than normal, indicating development of a duplicate domain of  
292 sensory tissue (Fig. 3K',L'). Taken together, our data indicate that the duplicated  
293 anterior domain resulting from either an Fgf gain-of-function or Hh loss-of-function  
294 includes a duplication of *pax5* expression, but that otic patterning progresses through  
295 completely different intermediate states to achieve this duplicated pattern, depending  
296 on the signalling pathway that has been disrupted.

297

298 **Expression of Fgf family genes in the otic epithelium following *fgf3* mis-**  
299 **expression or Hh inhibition**

300 Expression of *fgf3* is itself a marker of anterior otic epithelium from 21 hpf (Millimaki  
301 et al., 2007), and so can also be used to indicate the presence of a duplicated  
302 anterior otic pattern. We therefore examined the expression of *fgf* genes to provide  
303 additional confirmation of anterior character in the duplicated ears. To distinguish  
304 between expression of the *fgf3* transgene and endogenous *fgf3* expression, we used  
305 a probe generated from the *fgf3* 3' UTR, which is not included in the transgenic  
306 construct. In *Tg(hsp70:fgf3)* embryos after early (14 hpf) heat shock, expression of  
307 endogenous *fgf3* now appeared in a new domain at the posterior of the otic vesicle at  
308 22.5 hpf (Fig. 4A–B', arrowheads). Importantly, expression was not found across the  
309 entire anteroposterior axis, but was only present at the poles. Expression of  
310 endogenous *fgf3* in pharyngeal endoderm beneath the ear was reduced or missing in  
311 heat-shocked transgenic embryos (Fig. 4A–B', asterisks). We also examined the otic  
312 expression of *fgf8a* and *fgf10a* (Fig. 4C–F'). These genes are also normally  
313 expressed in the anterior of the otic vesicle, but show a less restricted pattern of  
314 expression than that of *fgf3*, with weaker expression also normally found in posterior  
315 regions (Léger and Brand, 2002; McCarroll and Nechiporuk, 2013; Thisse and  
316 Thisse, 2004). Following early heat shock of *Tg(hsp70:fgf3)* embryos, there was little  
317 change in the expression of *fgf8a* in the otic epithelium, whereas expression of *fgf10a*  
318 was strengthened at both anterior and posterior poles (Fig. 4C–F').

319 We also examined the otic expression of *fgf* genes after pharmacological inhibition of  
320 Hh signalling. At 22.5 hpf, following cyclopamine treatment from 14 hpf, there was  
321 little change in the expression domain or levels of *fgf3* or *fgf8a* in the otic epithelium  
322 (Fig. 4G–J'), although there was loss of an *fgf3* expression domain in pharyngeal  
323 pouch endoderm ventral to the ear (Fig. 4H', asterisk). Otic expression of *fgf10a* was  
324 strengthened in about 50% of cyclopamine-treated embryos ( $n=17/29$ ) at this early  
325 time point, especially at the anterior otic pole (Fig. 4K–L'). At 36 hpf (13.5 hours after  
326 cyclopamine wash-out), new discrete domains of *fgf3* and *fgf8a* had appeared at the  
327 posterior of the ear, indicating a duplication of anterior otic character (Fig. 4M–P',  
328 arrowheads). By 48 hpf, the duplicated expression domain of *fgf8a* persisted (Fig.  
329 4Q', arrowhead), and loss of the thickened epithelium characteristic of the posterior  
330 macula on the medial wall of the otic vesicle was also apparent (Fig. 4Q,Q',  
331 brackets). These data demonstrate that in both Fgf gain-of-function and Hh loss-of-

332 function contexts, the duplicated anterior otic character includes expression of *fgf*  
333 genes.

334

335 **Loss of *hmx3a* function results in a fusion of sensory maculae and otoliths,**  
336 **and a reduction in anterior otic character**

337 Given the early anterior-specific otic expression of *hmx3a* (Feng and Xu, 2010), the  
338 dependence of this expression on Fgf signalling (Adamska et al., 2000; Hammond  
339 and Whitfield, 2011; Kwak et al., 2002), and the rapid change in otic *hmx3a*  
340 expression after mis-expression of *fgf3* or Hh inhibition (this work), we hypothesised  
341 that *hmx3a* is required for normal otic anterior development. A previous study using  
342 morpholino-mediated knockdown suggested a requirement for both *hmx3a* and *hmx2*  
343 in acquisition of anterior otic identity and expression of *pax5* (Feng and Xu, 2010).  
344 However, the effects of individual gene knockdown or mutation were not reported.  
345 To test the individual requirement for *hmx3a* function in the acquisition of otic anterior  
346 identity, we examined the ear phenotype in homozygous mutants for a recessive  
347 truncating allele lacking the homeodomain, *hmx3a*<sup>SU3</sup>, which we generated using  
348 CRISPR/Cas9 technology (Fig. 5A; Materials and Methods). In homozygous  
349 *hmx3a*<sup>SU3/SU3</sup> mutants, the otoliths were positioned close together at 33 hpf, were side  
350 by side at 48 hpf, had started to fuse at 66 hpf and had fully fused by 4 dpf (Fig. 5B,C  
351 and data not shown). This phenotype appeared to be fully penetrant (38/143  
352 embryos from a cross between heterozygous parents; 26.6%). Semicircular canal  
353 pillars and the dorsolateral septum were present in the ears of mutant embryos,  
354 although formation of the ventral pillar was delayed. Overall, the ear shape appeared  
355 more symmetrical than in wild-type siblings (Fig. 5B,C). We imaged ears from three  
356 mutant embryos at 3 dpf to analyse sensory patch formation (Fig. 5D–E' and Fig. 5—  
357 Supplemental file 1). In all three ears imaged, the two maculae appeared fused or  
358 closely juxtaposed. Although the anterior and posterior elements of the fused macula  
359 were not obviously distinct, the overall shape retained some anteroposterior  
360 asymmetry. Hair cells of the anterior (utricle) macula were displaced medially, and  
361 in one of three ears imaged, were reduced in number. In the two other examples,  
362 however, normal numbers of hair cells were present (Fig. 5—Supplemental file 1).  
363 The posterior macula was misshapen, and lacked the anterior extension present in  
364 the wild type. All three cristae were present ( $n=3$  ears; Fig. 5D',E' and Fig. 5—  
365 Supplemental file 1).

366

367 To understand the basis of the *hmx3a*<sup>SU3/SU3</sup> mutant otic phenotype at 3–4 dpf, we  
368 examined expression of markers at earlier (otic vesicle) stages. At 24 hpf,

369 expression of both *hmx3a* and *hmx2* was reduced in intensity within the otic  
370 epithelium. On the medial side of the ear, the spatial extent of *hmx3a* and *hmx2*  
371 expression was unchanged (Fig. 5F–I, black arrowheads), but levels were reduced  
372 (white arrowheads); anteroventrally, there was a reduction in *hmx3a* expression in  
373 presumed neuroblasts (Fig. 5F', G', blue and light blue arrowheads), and a mild  
374 posterior expansion of the spatial extent of expression for both genes in ventral otic  
375 epithelium (Fig. 5G', I', red arrowheads). Expression of the anterior markers *pax5*  
376 and *fgf3* was drastically reduced within anterior otic epithelium in *hmx3a*<sup>SU3/SU3</sup>  
377 mutants at 24 hpf (Fig. 5J–M', arrowheads), although expression of *fgf3* in  
378 pharyngeal pouch endoderm ventral to the ear was unaffected (Fig. 5M, M', double-  
379 headed white arrows). Expression of the same markers in *hmx3a*<sup>SU3/SU3</sup> mutants at  
380 27 hpf was similar, but otic expression of *hmx2* was more strongly reduced than that  
381 of *hmx3a*, especially in the anterior pole in the area corresponding to the normal  
382 expression domain of *fgf3* and *pax5* (Fig. 5—Supplemental file 2). Expression of the  
383 posterior marker *fstn* at 30 hpf did not reveal any significant duplication of expression  
384 in anterior otic epithelium in *hmx3a*<sup>SU3/SU3</sup> mutant ears (Fig. 5—Supplemental file 2).  
385 Taken together, the results suggest that a loss of *hmx3a* function results in a similar  
386 phenotype to that of *fgf3*<sup>-/-</sup> (*lia*<sup>t21142/t21142</sup>) mutants (Hammond and Whitfield, 2011;  
387 Kwak et al., 2006; Maier and Whitfield, 2014). Although some anteroposterior  
388 asymmetry has been lost, the phenotype is not as strong as the double-posterior  
389 duplications that result from inhibition of all Fgf signalling or over-activity of Hh  
390 signalling, which show a complete loss of the anterior macula and lateral crista, and  
391 duplication of elements of the posterior macula (Hammond et al., 2010; Hammond  
392 and Whitfield, 2011). We conclude that *hmx3a* function is required for normal  
393 anterior otic expression of *pax5* and *fgf3*. However, loss of *hmx3a* function is not  
394 sufficient to result in a complete loss of anterior character and duplication of posterior  
395 structures at the anterior of the ear.

396

### 397 **Mis-expression of *hmx3a* is not sufficient to result in a duplication of anterior** 398 **otic identity**

399 As otic expression of the anterior markers *pax5* and *fgf3* is strongly reduced in  
400 *hmx3a*<sup>SU3/SU3</sup> single mutants, and because expression of *hmx3a* is an early  
401 transcriptional response to manipulations of both Fgf and Hh signalling, we  
402 hypothesised that mis-expression of *hmx3a* alone would be sufficient to drive the  
403 expression of *pax5* and *fgf3* in the posterior of the otic placode and to give rise to a  
404 double-anterior duplication, bypassing the requirement for Fgf or Hh pathway  
405 manipulation. To test this idea, we created a transgenic line driving expression of the

406 *hmx3a* coding sequence under the control of the *hsp70* heat-shock promoter. A 60-  
407 minute heat shock of *Tg(hsp70:hmx3a)* embryos at 12 hpf resulted in a robust and  
408 widespread expression of the *hmx3a* transgene two hours later (Fig. 6A–D). To  
409 avoid any disruption of otic placode induction, and to be comparable to the *fgf3* heat-  
410 shock experiments, we heat-shocked *Tg(hsp70:hmx3a)* embryos at 14 hpf to induce  
411 systemic mis-expression of *hmx3a*. After 30 minutes at 39°C, heat-shocked embryos  
412 were incubated at 33°C for 30 minutes before being returned to 28.5°C and  
413 incubated until 22.5 hpf, when they were fixed for processing and analysis, or until 3  
414 dpf for assessment of any ear duplication (Fig. 6E–Q’).

415

416 Despite robust expression of the *hmx3a* transgene, the ears of *Tg(hsp70:hmx3a)*  
417 embryos heat-shocked for 30 minutes at 14 hpf did not recapitulate the duplicated  
418 double-anterior otic phenotype seen in *Tg(hsp70:fgf3)* embryos. Position and  
419 number of the otoliths, morphology of the semicircular canal pillars and position of  
420 the sensory patches in heat-shocked embryos were normal at 3 dpf (Fig. 6E–H’;  
421 compare with Fig. 1B). At 22.5 hpf, otic vesicles were slightly smaller and rounder in  
422 heat-shocked transgenic embryos than those in heat-shocked non-transgenic  
423 siblings, but markers were expressed normally in most cases (Fig. 6I–Q’). Otic  
424 expression of *hmx2* was mildly up-regulated in a graded fashion (higher at the  
425 anterior) in 5/16 transgenic embryos at 22.5 hpf (Fig. 6I–K’), similar to the de-  
426 repression of *hmx* expression seen after Hh inhibition in wild-type embryos. There  
427 was also a mild up-regulation of *pax5* expression in posterior otic epithelium at 22.5  
428 hpf in 3/20 embryos (Fig. 6L–N’), but *pax5* was never expressed in a broad zone as  
429 in the *Tg(hsp70:fgf3)* embryos. A weak patch of *fgf3* expression appeared in  
430 posterior otic epithelium at 22.5 hpf, similar to the duplicated zone of endogenous  
431 *fgf3* expression in *Tg(hsp70:fgf3)* embryos, but in only 2/15 embryos (Fig. 6O–Q’).

432

433 To check that the *hmx3a* transgene was functional, we sequenced it from genomic  
434 DNA of transgenic embryos, which indicated that the open reading frame was intact  
435 (data not shown). We also examined the phenotype of transgenic embryos after an  
436 even earlier heat shock, during otic placode induction (8–9 hpf and 10–11 hpf).  
437 Here, we saw a range of otic abnormalities in 80% of transgenic embryos ( $n=106$ ),  
438 including missing otoliths, but some embryos also had small heads and eyes (Fig.  
439 6—Supplemental file 1). Ear patterning appeared normal in about 20% of transgenic  
440 embryos heat-shocked at these earlier stages. Longer (1- or 2-hour) heat shocks at  
441 14–15 hpf also resulted in normal otic patterning ( $n=49$ ; Fig. 6—Supplemental file 1).  
442 We conclude that the *hmx3a* transgene is likely to be functional, but that its mis-



443 expression alone during otic placode stages (14–15 hpf, which should result in strong  
444 systemic expression until at least 17 hpf) cannot substitute for Fgf mis-expression or  
445 Hh inhibition in the generation of a double-anterior duplicated ear. Up-regulation of  
446 *hmx3a* in the ear at later stages, beyond 18 hpf, was not sufficient either, as our late  
447 *fgf3* heat shock experiments demonstrated (Fig. 1—Supplemental File 2).

448

#### 449 **A dynamical model of anteroposterior patterning in the zebrafish ear**

450 Taken together, our data and those from previously-published studies suggest a  
451 temporal hierarchy of events for otic anteroposterior patterning dependent on  
452 extrinsic sources of Fgf and Hh signalling (Fig. 7). To assess whether this network of  
453 inferred genetic regulatory interactions can account for the dynamic expression  
454 patterns we observe, we developed a mathematical model of otic anteroposterior  
455 patterning in the wild-type ear and following manipulation of the Fgf and Hh signalling  
456 pathways. The model is based on a set of differential equations describing the  
457 genetic interactions in the otic epithelium outlined in Figure 7A. In addition,  
458 patterning in the model is dependent on the existence of two sources of spatial  
459 information. First, we assume that otic competence to express *fgf* genes in response  
460 to Fgf and Hmx3a protein is localised to the two poles of the developing otic vesicle.  
461 This is necessary in the model to ensure that induced endogenous *fgf* mRNA  
462 expression in the otic epithelium (*fgf<sub>i</sub>*) is restricted to the poles, even when *fgf3* is  
463 expressed uniformly throughout the tissue following heat shock. Second, we  
464 represent the effect of *fgf* mRNA expression in rhombomere 4 as an anterior-to-  
465 posterior gradient of extrinsic Fgf (Fgf<sub>e</sub>) protein, present at high levels up to 30% of  
466 the otic vesicle length (corresponding to the position of the rhombomere 4/5  
467 boundary), and forming a decreasing spatial gradient across the remainder of the otic  
468 axis (Fig. 7A and Fig. 8—Supplemental File 1). Although we do not have a measure  
469 of actual Fgf protein concentration, our assumption is supported by measurements of  
470 fluorescence across the otic anteroposterior axis in the *Tg(dusp6:d2EGFP)* reporter  
471 line, which expresses a destabilised GFP variant as an indirect readout of Fgf activity  
472 (Molina et al., 2007) (Fig. 7—Supplemental file 1).

473

474 We assume a spatially uniform level of Hh signalling throughout the otic epithelium  
475 (see discussion in (Hammond et al., 2003), and that Hh signalling antagonises the  
476 effects of Fgf signalling on otic anterior marker genes (*fgf<sub>i</sub>*, *hmx3a* and *pax5*) by  
477 increasing their response threshold for Fgf-induced expression. This functional  
478 attenuation is unlikely to be at the level of an immediate target of Fgf signalling such  
479 as *etv4*, as Hh inhibition did not result in major changes to *etv4* expression

480 ((Hammond and Whitfield, 2011); this work). One possibility is that it could reflect  
481 integration of activity of the two signalling pathways at the level of binding sites in the  
482 promoters of the otic anterior genes. In addition, we propose that Hmx3a, together  
483 with Fgf and Hh, regulates its own expression and that of other genes in the network.  
484 Currently, our data do not distinguish whether these regulatory relationships are  
485 direct or indirect.

486

487 The dynamic behaviour of the model is presented in [Figure 8](#) (for full details, see [Fig.](#)  
488 [8—Supplemental File 1](#)). In wild-type embryos ([Fig. 8](#), left-hand column), expression  
489 of *hmx3a* and *pax5* is triggered in anterior otic tissue. The extent of expression is  
490 determined by the spatial reach of the extrinsic Fgf protein ( $Fgf_e$ ) gradient from  
491 rhombomere 4. Although all cells in the model are competent to express the anterior  
492 markers *hmx3a* and *pax5*, they do not receive sufficient  $Fgf_e$  to do so at the posterior  
493 otic pole in a wild-type embryo. After transient heat shock-induced systemic mis-  
494 expression of *fgf3* at 14 hpf ([Fig. 8](#), middle column), expression of both *hmx3a* and  
495 *pax5* is induced across the entire anteroposterior axis. However, the ability of heat  
496 shock-induced *fgf3* mis-expression to trigger endogenous intrinsic *fgf* (*fgf<sub>i</sub>*)  
497 expression requires the coincidence of both Fgf protein and competence to express  
498 *fgf<sub>i</sub>* at the poles, and so *fgf<sub>i</sub>* is not induced in the middle of the otic axis. After decay  
499 of heat shock-induced Fgf protein, expression of *pax5* is lost from central regions, but  
500 is maintained at the poles by Fgf signalling from *fgf<sub>i</sub>* expression. By contrast,  
501 expression of *hmx3a* is maintained in central regions due to its autoregulation. De-  
502 repression of anterior markers after Hh pathway inhibition ([Fig. 8](#), right-hand column)  
503 results from a lowering of the threshold for response to Fgf signalling, establishing  
504 duplicate expression domains of *pax5* and *fgf3* at the posterior pole. Thus, although  
505 both heat shock-driven mis-expression of *fgf3* and inhibition of Hh signalling result in  
506 anterior duplications ([Fig. 8](#); compare the patterns at the 36 hpf time point), the  
507 transient dynamics exhibited by the model at earlier time points are distinct.

508



509 **Discussion**

510 **Different transcriptional dynamics in the otic vesicle in response to**  
511 **manipulations of Fgf and Hh signalling**

512 The zebrafish otic placode is a convenient system in which to understand the gene  
513 network dynamics that lead to asymmetries along the axis of a developing organ.  
514 Asymmetries in gene expression are evident from early (otic placode) stages, but the  
515 system is clearly equipotential, since either a gain of Fgf signalling or a loss of Hh  
516 pathway activity at otic placode stages can produce remarkably similar double-  
517 anterior zebrafish ears at 3 dpf (Hammond et al., 2003; Hammond and Whitfield,  
518 2011); this work. Interestingly, we have shown here that this final duplicated pattern  
519 arises via very different intermediate states in terms of gene expression patterns,  
520 depending on the signalling pathway that has been disrupted. Mis-expression of *fgf3*  
521 at 14 hpf leads to a rapid loss of asymmetry, with broad expansion of anterior otic  
522 markers across the entire anteroposterior axis of the ear within a few hours of heat  
523 shock-driven mis-expression. Expression of *pax5*, which is required for normal  
524 development of the anterior (utricle) macula (Kwak et al., 2006), later resolves into  
525 two discrete domains. By contrast, initial asymmetries in gene expression persist for  
526 several hours after inhibition of Hh pathway activity, with new duplicate expression  
527 domains of anterior markers (*pax5*, *fgf3* and *fgf8a*) only appearing nearly a day later  
528 at the posterior otic pole. We have identified *hmx3a* as an early otic transcriptional  
529 response to manipulations of both signalling pathways. However, although a loss of  
530 *hmx3a* demonstrates its requirement for normal otic patterning, this does not result in  
531 a complete double-posterior duplication, and mis-expression of *hmx3a* does not  
532 appear to be sufficient to drive the formation of a double-anterior ear.

533

534 Our data and mathematical model suggest that the Fgf/Hh system is sufficient to  
535 pattern the anteroposterior axis of the ear. In our scheme, there is only one input  
536 (extrinsic Fgf activity) that has a graded distribution across the otic anteroposterior  
537 axis. Notably, there is no need to infer an opposing graded input of extrinsic  
538 signalling activity that is high at the posterior of the ear. Although Retinoic Acid (RA)  
539 is thought to form such a gradient, and contributes to anteroposterior patterning in  
540 both the chick and zebrafish ear (Bok et al., 2011; Radosevic et al., 2011), its activity  
541 can clearly be over-ridden by manipulations of Fgf or Hh signalling in generating  
542 either double-anterior or double-posterior zebrafish ears. Our model therefore differs  
543 from other models of axial patterning, for example in generation of dorsoventral  
544 pattern in the vertebrate neural tube. Here, information from two anti-parallel noisy  
545 gradients is integrated and refined by cross-repressing interactions between target

546 genes, providing precise positional information along the axis (Briscoe and Small,  
547 2015; Zagorski et al., 2017). However, the sufficiency of our network and model  
548 does not necessarily rule out a contribution from the RA gradient in generating  
549 correct anteroposterior patterning in the wild-type ear.

550

551 At present, we do not have a full mechanistic explanation for the differences in  
552 response dynamics after manipulations of the Fgf and Hh signalling pathways.  
553 Although *hmx3a* responds rapidly to manipulation of Fgf signalling, its regulation may  
554 well be indirect; a recent study identified only one gene, *Etv5*, as a direct up-  
555 regulated target of Fgf signalling during induction of otic-epibranchial precursor cells  
556 in the chick (Anwar et al., 2017). In zebrafish, transcription of *etv4* and *spry4* is  
557 known to be an early response to Fgf signalling (Raible and Brand, 2001; Roehl and  
558 Nüsslein-Volhard, 2001; Scholpp and Brand, 2004), with *spry4* expression appearing  
559 within one hour of implantation of a bead coated with Fgf8 protein during epiboly  
560 stages (Scholpp and Brand, 2004). Our work here shows that robust, systemic  
561 expression of *etv4* occurs within two hours of the onset of heat shock in  
562 *Tg(hsp70:fgf3)* embryos; we had previously shown strong expression of *etv4* in the  
563 otic placode four hours after heat shock (Hammond and Whitfield, 2011). Thus, *Etv4*  
564 is a good candidate for an immediate early transcriptional effector of Fgf signalling in  
565 our proposed genetic network. However, as *etv4* mRNA expression is not strongly  
566 perturbed by Hh pathway inhibition ((Hammond and Whitfield, 2011); this work),  
567 effects of Hh and Fgf on *hmx3a* expression are likely to be integrated further  
568 downstream, for example at the level of the *hmx3a* promoter. The slower response  
569 of *hmx3a* transcription to Hh inhibition might reflect the persistence of Hh pathway  
570 effectors, such as Gli activator proteins, which must be degraded before the effect of  
571 inhibiting Smoothed with cyclopamine can take effect.

572

573 As the otic vesicle develops, additional levels of regulation are likely to contribute to  
574 the regulation of *hmx3a* and other genes in the network. For example, in the chick,  
575 regulation of *Hmx3* expression in the dorsolateral otocyst has recently been shown to  
576 be influenced by both Shh and non-canonical BMP signalling through PKA and  
577 GLI3R (Ohta et al., 2016). In addition, negative feedback on otic *fgf* expression via  
578 *sprouty* genes (Léger and Brand, 2002) is likely to help to restrict gene expression to  
579 the poles and sharpen expression domain boundaries within the otic epithelium.

580

581 **Requirement for intrinsic factors at the otic anterior and posterior poles in**  
582 **establishing a duplicate pattern after signalling pathway manipulation**

583 One of the intriguing features of the double-anterior ears is that systemic mis-  
584 expression of an anteriorising factor (*fgf3*) gives rise to two defined and separate  
585 anterior maculae with mirror-image symmetry, rather than establishing uniform  
586 anterior identity across the entire medial otic domain. The final duplicate pattern  
587 develops despite the initial broad expression of anterior markers after heat shock,  
588 which demonstrates that the entire medial side of the otic placode and vesicle is  
589 competent to express *hmx* genes and *pax5* in response to Fgf signalling. However, a  
590 day after heat shock, expression of *pax5* is lost from the centre of this domain and  
591 only maintained at the anterior and posterior poles of the otic vesicle, suggesting  
592 either that expression is subsequently repressed in the central domain, or that an  
593 intrinsic factor or factors is required to maintain expression at the poles. Attractive  
594 candidates for the latter role include *atoh1a*, which is expressed in discrete domains  
595 at the anterior and posterior otic poles at 14 hpf (Millimaki et al., 2007). *Atoh1a* is  
596 thought to act in a positive feedback loop together with Fgf signalling in the zebrafish  
597 ear (Millimaki et al., 2007; Sweet et al., 2011). Fgf pathway activity is also observed  
598 at both poles of the otic vesicle at 24 hpf (this work), 28 hpf and 50 hpf using a  
599 destabilised fluorescent transgenic reporter, *Tg(dusp6:d2EGFP)* (Molina et al., 2007).  
600 We hypothesise that a positive feedback loop involving a pole-specific factor and all  
601 three *fgf* genes contributes to the maintenance of anterior-specific gene expression  
602 and generation of the double-anterior pattern. This builds on previous feedback  
603 models for anterior otic patterning and the regulation of otic *pax5* expression (Feng  
604 and Xu, 2010; Kwak et al., 2006).

605

606 A similar broad medial expansion of *hmx3a* and *pax5* has been recently reported to  
607 result from systemic mis-expression of *sox2* or *sox3* at 12.5 hpf (Gou et al., 2018).  
608 However, this early mis-expression results in a smaller and mis-shapen otic vesicle  
609 (most likely due to a disruption of otic induction), and phenotypes were not followed  
610 beyond 30 hpf. It will be interesting to see whether a duplicated anterior pattern  
611 results from these manipulations.

612

### 613 **Comparison of the *hmx3a*<sup>SU3/SU3</sup> and *fgf3*<sup>t21142/t21142</sup> mutant otic phenotypes in the** 614 **zebrafish**

615 The otic phenotype of *hmx3a*<sup>SU3/SU3</sup> single mutants closely resembles that of  
616 *hmx3a/hmx2* double morphants (Feng and Xu, 2010), and of *fgf3*<sup>t21142/t21142</sup> mutants  
617 (Hammond and Whitfield, 2011; Kwak et al., 2006; Maier and Whitfield, 2014). The  
618 similarity of the *fgf3* and *hmx3a* otic mutant phenotypes suggests that a major role for  
619 the extrinsic Fgf3 signal is to activate *hmx3a* expression in anterior otic epithelium.

620 Note that pharmacological inhibition of all Fgf signalling (Hammond and Whitfield,  
621 2011) or over-activity of the Hh pathway (Hammond et al., 2010) both result in a  
622 stronger otic phenotype than in *hmx3a*<sup>SU3/SU3</sup> mutants. The retention of some  
623 anteroposterior asymmetries in gene expression and the fused sensory macula in  
624 *hmx3a*<sup>SU3/SU3</sup> mutants, together with the presence of the lateral crista, suggest that  
625 the *hmx3a*<sup>SU3/SU3</sup> otic phenotype, like that of *fgf3*<sup>t21142/t21142</sup> mutants, does not  
626 represent a complete double-posterior duplication. We also failed to see strong  
627 ectopic expression of the posterior marker *fsta* at the anterior of the ear in  
628 *hmx3a*<sup>SU3/SU3</sup> mutants, although this is a less reliable indicator of posterior  
629 duplication; it is expressed at both poles of the ear following strong Fgf inhibition  
630 (Hammond and Whitfield, 2011), but lost altogether in the extreme double-posterior  
631 ears that can result from elevated Hh signalling (Hammond et al., 2010).

632

633 Despite the similarities between the loss-of-function phenotypes for *fgf3* and *hmx3a*  
634 in the zebrafish ear, the gain-of-function effects for each of the two genes are  
635 strikingly different. Whereas mis-expression of *fgf3* at 14 hpf reliably generates a  
636 complete double-anterior ear, mis-expression of *hmx3a* at the same time point had  
637 very little effect on otic development. It is remarkable just how robust the embryo is  
638 to this kind of perturbation, considering that the systemic high levels of transgene  
639 expression must be energetically expensive to support. Indeed, there is usually  
640 some transient developmental delay after heat shock, but gross patterning of the ear  
641 at 3 dpf appeared normal in *Tg(hsp70:hmx3a)* heat-shocked embryos.

642

643 Why, then, is *hmx3a* ineffective in establishing duplicate anterior development when  
644 mis-expressed? It is possible that it needs to be delivered together with *hmx2*; the  
645 two genes are tightly linked on zebrafish chromosome 17 (Wotton et al., 2009),  
646 spatially co-expressed in the zebrafish otic vesicle (although with different temporal  
647 onset) (Feng and Xu, 2010), and are known to have partially overlapping roles in the  
648 mouse ear (Wang et al., 2004). A predicted *hmx3b* gene (RefSeq XM\_017358610.2)  
649 is also present in the zebrafish genome on chromosome 12, although it does not  
650 appear to be expressed in the ear (S. England and K. Lewis, unpublished). If a  
651 second Hmx family protein or other binding partner was limiting, this might explain  
652 the lack of activity of the mis-expressed *hmx3a* transcript. Alternatively, Hmx3a  
653 could act as a competence factor, only functioning in the context of high Fgf or low  
654 Hh signalling to initiate duplicate anterior otic development. It is also possible that  
655 Fgf signalling abrogates an unidentified negative regulator of the otic anterior gene  
656 network at the same time as activating the expression of *hmx3a*. In the presence of

657 such an inhibitor, systemic over-expression of *hmx3a* would be ineffective at  
658 activating the expression of genes such as *hmx2*, *pax5* and *fgf3* in posterior otic  
659 domains.

660

661 **Comparison of the effects of loss of *Hmx3* function on otic development**  
662 **between zebrafish and amniotes**

663 Anterior-specific otic expression of *Hmx3* and *Hmx2*, including their temporal order of  
664 expression onset in the ear, is conserved between zebrafish, mouse and chick (Feng  
665 and Xu, 2010; Herbrand et al., 1998; Rinkwitz-Brandt et al., 1995; Wang et al., 1998).  
666 Loss of *Hmx3* function in the mouse causes a range of reported otic defects with  
667 variable penetrance and expressivity, which depend on the nature of the targeted  
668 mutant allele. A homozygous targeted deletion of exon 1 and part of exon 2 of *Hmx3*  
669 resulted in a variable disruption of the lateral (horizontal) and posterior semicircular  
670 canal ducts, and loss of the lateral (horizontal) crista (Hadrys et al., 1998). A weaker  
671 phenotype was seen after disruption of the homeodomain in exon 3 of *Hmx3*; in  
672 these mutants, all three semicircular canal ducts were present, but the lateral  
673 (horizontal) ampulla and crista were missing. The utricular and saccular maculae  
674 were juxtaposed in a common utriculosaccular chamber (Wang et al., 2004; Wang et  
675 al., 1998), as we found in the zebrafish *hmx3a*<sup>SU3/SU3</sup> mutant. A notable difference  
676 between the mouse and zebrafish mutants is the presence of all three cristae,  
677 including the lateral crista, in the zebrafish *hmx3a*<sup>SU3/SU3</sup> mutants. Formation of the  
678 ventral pillar for the lateral canal was also present, although delayed. It will be  
679 interesting to see whether mutations in *hmx2* (not currently available) affect  
680 morphogenesis of the zebrafish semicircular canal system; in the mouse, targeted  
681 disruption of *Hmx2* results in a loss of all three semicircular canal ducts, with partial  
682 or complete loss of some ampullae and cristae, in addition to a fused utriculosaccular  
683 chamber (Wang et al., 2001). In humans, *HMX3* and *HMX2* are located together,  
684 close to *FGFR4*, on chromosome 10; hemizygous microdeletions that remove all  
685 three genes are thought to be causative for syndromes characterised by inner ear  
686 morphological anomalies, vestibular dysfunction and sensorineural hearing loss  
687 (Miller et al., 2009; Sangu et al., 2016).

688

689 In conclusion, our study demonstrates that although Fgf gain-of-signalling and Hh  
690 loss-of-signalling produce similar morphological duplications of the zebrafish ear,  
691 they do so via distinct dynamical patterns of gene expression, providing valuable  
692 insights into normal anterior otic development. In addition, we determine that *hmx3a*,  
693 a gene expressed as an early transcriptional response to both Fgf and Hh

694 manipulation, has a conserved role in correct separation of the sensory maculae  
695 within the otic vesicle, and is required—but not sufficient—for normal anterior otic  
696 development. We have also shown that our proposed genetic network for zebrafish  
697 otic anterior development can be recapitulated with a mathematical model that  
698 assumes interactions between a graded extrinsic source of Fgf, a uniform inhibitory  
699 influence of Hh, and equipotential competence to adopt an anterior identity at the otic  
700 poles. Interactions between these inputs and their downstream targets within the otic  
701 tissue (*hmx3a*, *hmx2*, *pax5* and *fgf* genes) lead to correct anteroposterior patterning  
702 in the developing zebrafish ear. The model will be a useful framework for further  
703 elucidation and functional validation of the proposed gene regulatory network  
704 required for the acquisition of anterior otic identity in the zebrafish.



## 705 **Materials and Methods**

### 706 **Animals**

707 Adult zebrafish (*Danio rerio*) were kept in circulating water at 28.5°C with a 14-hour  
708 light/10-hour dark cycle. The wild-type line used was AB; mutant alleles were  
709 *hmx3a*<sup>SU3</sup> (this work; see below for details), and *smo*<sup>hi1640Tg</sup> (Chen et al., 2001);  
710 transgenic lines were *Tg(dusp6:d2EGFP)* (Molina et al., 2007), *Tg(hsp70:fgf3)*  
711 (Lecaudey et al., 2008), *Tg(hsp70:fgf8a)<sup>x17</sup>* (Millimaki et al., 2010) and  
712 *Tg(hsp70:hmx3a)* (this work; see below for details). The *Tg(hsp70:fgf3)* line was  
713 maintained on a *mitfa*<sup>w2/w2</sup> background to reduce pigmentation. Embryos were  
714 staged as described (Kimmel et al., 1995) and incubated at 28.5°C in E3 (5 mM  
715 NaCl, 0.17 mM KCl, 0.33 mM CaCl<sub>2</sub>, 0.33 mM MgSO<sub>4</sub>, 0.0001% methylene blue),  
716 unless otherwise indicated.

### 717 **Heat shock**

718 Embryos were cultured in E3 at 28.5°C prior to heat shock. For heat shock, embryos  
719 from either a cross between two hemizygous transgenic carriers, or an outcross  
720 between a transgenic carrier and a wild-type, were transferred to 25 ml of preheated  
721 E3 in a Falcon tube and incubated at 39°C for 30 minutes, unless otherwise  
722 indicated. Embryos were then returned to their original plates of E3, which had been  
723 preheated to 33°C during the heat shock, and incubated for a further 30 minutes at  
724 33°C. Plates were then returned to 28.5°C and incubated until embryos reached the  
725 desired stage for fixation. In heat-shock experiments with mixed batches of  
726 transgenic and non-transgenic embryos, a transgenic genotype was confirmed by  
727 expression of tdTomato in *Tg(hsp70:hmx3a)* embryos or abnormal shape of the yolk  
728 extension in *Tg(hsp70:fgf3)* embryos, in addition to analysis of the phenotypes  
729 described in the text.

### 730 **Cyclopamine treatment**

731 Embryos were treated in 12-well plates (3 ml total volume; ≤30 embryos per well) at  
732 28.5°C with InSolution Cyclopamine, *V. californicum* (Calbiochem). Chorions were  
733 punctured with a sterile hypodermic needle prior to treatment to improve compound  
734 penetration. After treatment, embryos were washed twice in E3 before either being  
735 fixed or incubated in E3 before fixation later. Vehicle-only controls consisted of a  
736 volume of the solvent (ethanol) equivalent to that used in the highest experimental  
737 treatment concentration. Embryos from the same batch (siblings) were randomly  
738 allocated into control and treatment groups.



739 **In situ hybridisation**

740 Embryos were dechorionated and fixed in 4% paraformaldehyde overnight at 4°C. In  
741 situ hybridisation was carried out as described (Thisse and Thisse, 2008). For most  
742 experiments, at least 25 embryos (biological replicates) were stained in any given  
743 batch. Where relevant, numbers of embryos with the phenotype of interest and total  
744 number in the batch (e.g. 29/30) are shown directly on the figure panels (see figure  
745 legends for details). Analysis of gene expression via in situ hybridisation is not  
746 quantitative, but we have chosen markers that give a clear and robust qualitative  
747 response to changes in signalling pathway activity. We have used information from  
748 these spatial expression patterns to infer parameters for the mathematical model  
749 (see below). Where appropriate, we have measured the spatial extent of expression  
750 along the medial side of the otic vesicle in a dorsal view using ImageJ.

751

752 **Generation of a template for the *fgf3* 3' UTR-specific in situ hybridisation probe**

753 The 3' UTR of *fgf3* was amplified from wild-type (AB strain) genomic DNA in a nested  
754 PCR, incorporating the T7 promoter, using the following primers: F1  
755 TCTCTTGACACAGATGGAGATCC, R1 AATATACAAAGTACTCCTGATTGCA; F2  
756 AAGGCCACTGAGAGTCCAAAA, T7-R2  
757 TAATACGACTCACTATAGGGCAGTAGCCTATCACATGTACGT. Each PCR was  
758 run for 30 cycles with an annealing temperature of 53°C.

759

760 **Generation of the *hmx3a*<sup>SU3</sup> mutant allele**

761 The single guide RNA (sgRNA) targeting *hmx3a* was designed using CHOPCHOP  
762 (Labun et al., 2016; Montague et al., 2014). The sgRNA DNA template was  
763 generated using the cloning-free method of Gagnon and colleagues (Gagnon et al.,  
764 2014). The template was transcribed and purified using the standard protocols of  
765 the MEGashortscript T7 kit (AM1354, Thermo Fisher Scientific). sgRNA was  
766 resuspended in 40 µl of sterile water and the concentration and purity measured  
767 using spectrophotometry, before aliquoting for storage at -80°C. To  
768 make Cas9 mRNA, *pCS2-nls-zCas9-nls* plasmid DNA (Jao et al., 2013) was digested  
769 with *NotI* and purified by phenol:chloroform extraction, before being transcribed and  
770 purified using standard protocols of the mMACHINE SP6 kit (AM1340,  
771 Thermo Fisher Scientific). The resultant mRNA was resuspended, assayed and  
772 stored as for the sgRNA. The single cell of one-cell stage AB wild-type embryos  
773 was injected with 2 nl of a mixture of 200 ng/µl sgRNA + 600 ng/µl *nls-ZCas9-*  
774 *nls* mRNA. Founders were identified by high resolution melt analysis, using the  
775 following primers: PMA F: CGAATGCTAATTTGGCCTCTATTACT and PMA R:

776 TTTTGTTGTCGTCTTCATCGTCC, and Precision Melt Supermix for High Resolution  
777 Melt (HRM) Analysis (172-5112, Bio-Rad), performed on a CFX96 Touch System  
778 (1855195, Bio-Rad), equipped with Precision Melt Analysis Software (1845025, Bio-  
779 Rad). Amplification data were generated using the following program: 95.0°C for 3  
780 minutes, followed by 45 cycles of 95.0°C for 15 seconds, 60.0°C for 20 seconds and  
781 70.0°C for 20 seconds. Melt data were generated using the following program:  
782 65.0°C for 30 seconds, 65.0°C–95.0°C at an incremental rate change of 0.2°C, held  
783 for 5 seconds each step, 95.0°C for 15 seconds. Stable F1 heterozygous fish were  
784 confirmed by sequencing. All subsequent genotyping was performed by PCR, using  
785 the primers F: TGGCAAAGTGACACGACCAG and R:  
786 GAGAACACCGTGCGAGTTTTC, Taq DNA Polymerase (M0320S, NEB) and the  
787 PCR program: (94.0°C for 2 minutes, 35 cycles of: 94.0°C for 30 seconds, 64.9°C for  
788 30 seconds and 72.0°C for 30 seconds, followed by a final extension at 72.0°C for 2  
789 minutes). The *hmx3a*<sup>SU3</sup> allele is a 69 bp insertion, flanked on either side by 2-base  
790 mismatches. The insertion introduces a premature stop codon at nucleotides 352-  
791 354 of the edited coding sequence. The insertion in the mutant allele can be  
792 distinguished by performing gel electrophoresis on a 2% TBE agarose gel (100V for  
793 40 minutes). The wild-type allele generates a 331 bp product, compared to the 400  
794 bp mutant allele product.

795

#### 796 **Generation of the *Tg(hsp70:hmx3a)* line**

797 The zebrafish *hmx3a* cDNA sequence (RefSeq NM\_131634.2), including the  
798 complete open reading frame, endogenous Kozak sequence and 15 bp of 3' UTR,  
799 was cloned into a *Tol2*-containing *ubi:tdtomato* destination vector, flanked by a 5'  
800 *hsp70* promoter and a 3' SV40 late polyadenylation signal sequence, using the  
801 Tol2kit (Kwan et al., 2007) (Invitrogen). 50 ng of this construct were injected into  
802 one-cell stage embryos together with 50 ng of *in vitro*-transcribed transposase RNA.  
803 Injected embryos (G0) were raised to adulthood, and their progeny (F1) screened for  
804 expression of the tdTomato marker. F1 embryos with positive expression were  
805 raised to adulthood to generate a stable *Tg(hsp70:hmx3a)* transgenic line. Progeny  
806 were tested by *in situ* hybridisation after heat shock to check for misexpression of the  
807 *hmx3a* transgene.

808

#### 809 **Phalloidin staining**

810 Embryos were fixed in 4% PFA overnight, washed in PBS (3×10 minutes) and  
811 permeabilised in 2% Triton-X100 (Sigma) for 3-4 days at 4°C. Following further  
812 washes in PBS (3×5 minutes), embryos were stained with FITC-phalloidin (1:20;

813 Sigma) or Alexa Fluor 647-phalloidin (1:100; Thermo) in PBS (overnight, 4°C).  
814 Embryos were washed in PBS (3×60 minutes), dissected in PBS and mounted in  
815 Vectashield (Vectorlabs) prior to confocal imaging.

### 816 **Microscopy, photography and image processing**

817 Live and fixed embryos were imaged on either an Olympus BX51 or a Zeiss Axio  
818 Imager M1 compound microscope using brightfield, DIC and epifluorescence optics  
819 as appropriate, and CellB or Axiovision image acquisition software, respectively. For  
820 confocal imaging, either a Nikon A1 or a Zeiss LSM 710 confocal microscope were  
821 used. For fluorescent imaging requiring large fields of view, a Zeiss Axio Zoom.V16  
822 stereomicroscope with Zen acquisition software was used. The movie and  
823 associated still images shown in the supplementary material for Fig. 7 were acquired  
824 with a Zeiss Z.1 light-sheet microscope. Sample drift was corrected using the  
825 Manual Drift Correction plugin within FIJI (Fiji Is Just ImageJ) (Schindelin et al.,  
826 2012). FIJI was used for all image processing. Figure panels were assembled using  
827 Adobe Photoshop 2015.5.0. All dorsal views (except in the supplementary material  
828 for Fig. 7) are shown with anterior to the top; lateral views show anterior to the left.

### 829 **Statistical analysis**

830 Statistical analyses were performed using GraphPad Prism version 7.0c for Mac  
831 OSX (GraphPad software, La Jolla California USA, [www.graphpad.com](http://www.graphpad.com)). See figure  
832 legends for details.

### 833 **Mathematical model**

834 Full information for generation of the mathematical model, including a list of  
835 parameters used, is given in [Figure 8—Supplemental File 1](#).

### 836 **Acknowledgements**

837 We thank the Gilmour lab for the *Tg(hsp70:fgf3)* line, the Riley lab for the  
838 *Tg(hsp70:fgf8a)* line, and Michael Tsang and aquarium staff at University College  
839 London for the *Tg(dusp6:d2EGFP)* line. We are grateful to Whitfield lab members for  
840 discussion, Sarah Burbridge, Montserrat Garcia Romero, Ginny Grieb and Leslie  
841 Vogt for excellent technical support, and the Sheffield and Lewis lab Aquarium  
842 Teams for expert fish care.

843

### 844 **Author contributions:**

845 RDH: Conceptualisation, investigation, formal analysis, methodology, validation,  
846 visualisation, preparation of figures, contribution to writing the manuscript

847 SJE, KEL: Generation and analysis of the *hmx3a*<sup>SU3</sup> mutant allele, preparation of  
848 figures, contribution to writing the manuscript  
849 SB, MM, NvH: investigation, visualisation  
850 NAMM: Supervision, design and generation of the mathematical model, preparation  
851 of figures, contribution to writing the manuscript  
852 TTW: Conceptualisation, funding acquisition, project administration, supervision,  
853 investigation, validation, formal analysis, visualisation, preparation of figures, writing  
854 the manuscript

855

#### 856 **Funding**

857 RDH was funded by a BBSRC White Rose Doctoral Training Partnership Award in  
858 Mechanistic Biology (BB/J014443/1). Work in the Whitfield lab was funded by the  
859 BBSRC (BB/M01021X/1). The Sheffield zebrafish aquarium facilities were supported  
860 by the MRC (G0700091). Fluorescent imaging was carried out in the Sheffield  
861 Wolfson Light Microscopy Facility, supported by a BBSRC ALERT14 award for light-  
862 sheet microscopy (BB/M012522/1) to TTW and SB. Research conducted in the  
863 Lewis Lab was funded by NIH NINDS R01 NS077947 awarded to KEL. The Lewis  
864 Lab aquarium facilities were also supported by HFSP RGP0063, NSF IOS 1257583  
865 and New York State Spinal Cord Injury Fund (KEL).

866

#### 867 **Statement on ethical issues**

868 All animal work in the Whitfield lab was covered by licencing from the UK Home  
869 Office. All zebrafish experiments conducted in the Lewis lab were approved by the  
870 Syracuse University Institutional Animal Care and Use Committee (IACUC).

871 **Figures**

872

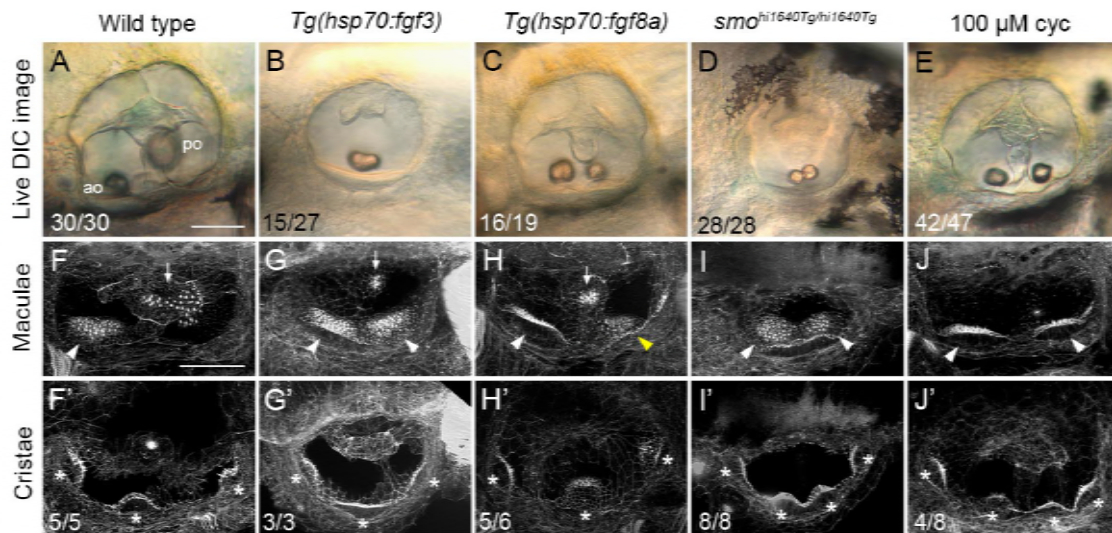

873

874

875

**Figure 1. Duplicate double-anterior ear phenotypes resulting from early Fgf mis-expression or Hh pathway inhibition**

876

(A–E) Differential interference contrast (DIC) images of ears in live embryos at 3 dpf (72 hpf).

877

(F–J') Confocal images of FITC-phalloidin stains, revealing stereociliary bundles on sensory

878

hair cells in the maculae (F–J) or cristae (F'–J'). Anterior maculae and duplicate anterior

879

maculae are marked with arrowheads; posterior maculae and remnants of posterior maculae

880

are marked with arrows. Cristae and duplicate cristae are marked with asterisks. Yellow

881

arrowhead in H indicates macula that is ventromedial in position, and close to remnants of the

882

posterior macula (arrowhead). Note the enlarged lateral crista in G'. (The bright spot in the

883

centre of F' is a lateral line neuromast.) Representative phenotypes are shown; numbers of

884

embryos displaying these phenotypes are indicated on the panels. All *Tg(hsp70:fgf3)* heat-

885

shocked embryos ( $n=27$ ) and *smo*<sup>hi1640Tg/hi1640Tg</sup> mutants ( $n=28$ ) showed double-anterior ears.

886

In B, 15/27 ears had a single fused otolith as shown; the remaining 12/27 ears had two

887

separate, but small and ventrally-positioned otoliths. In D, 17/28 ears had two otoliths

888

touching as shown; in the remaining 11/28 ears, the otoliths were separate, but both small

889

and ventrally positioned. Genotypes or treatments are indicated for each column. Transgenic

890

lines were subject to 30 minutes of heat shock at 14 hpf. Additional controls for this figure are

891

shown in [Figure 1—Supplemental file 1](#). Lateral views; anterior to the left. Abbreviations: ao,

892

anterior (utricle) otolith; po, posterior (saccular) otolith; cyc, cyclopamine. Scale bar in A, 50

893

μm (applies to A–E); scale bar in F, 50 μm (applies to F–J').

894



895

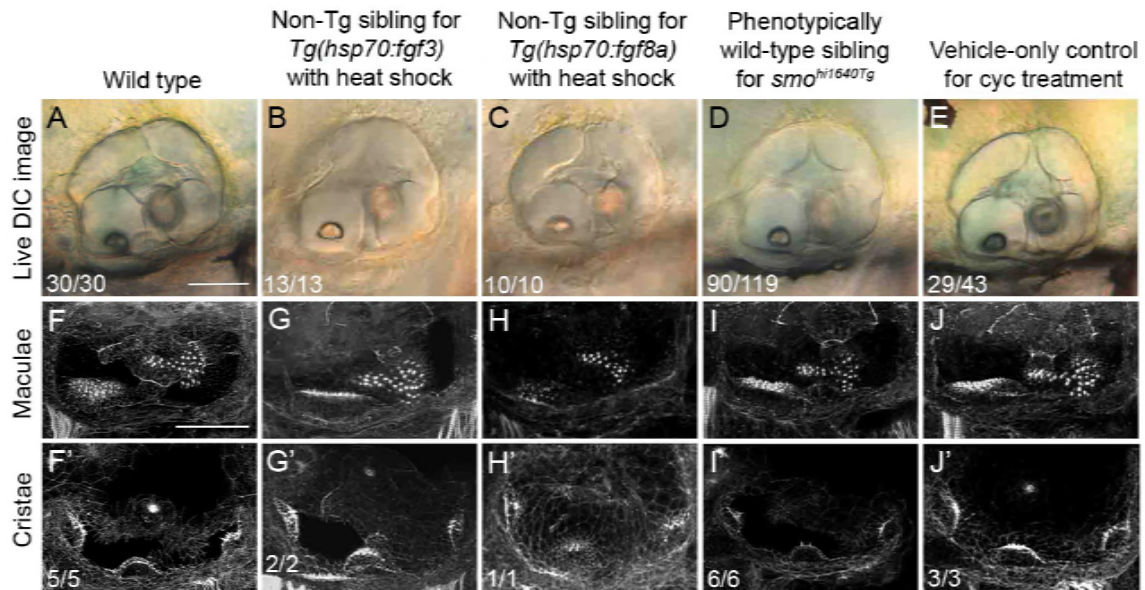

896

897

898

899

900

901

902

903

904

905

906

907

908

**Figure 1—Supplemental file 1. Normal ear development in control embryos for experimental manipulations of Fgf and Hh signalling**

(A–E) Differential interference contrast (DIC) images of ears in live embryos at 3 dpf (72 hpf). (F–J') Confocal images of FITC-phalloidin stains, revealing stereociliary bundles on sensory hair cells in the maculae (F–J) or cristae (F'–J'), as shown in Fig. 1. The first column ('Wild type') repeats column 1 of Fig. 1 for comparison. Subsequent columns show representative images of controls for the experiments shown in Fig. 1. All ears shown were patterned normally, although views and focal planes differ slightly. All ears were of normal size and had two normally-positioned otoliths (A–E), had two maculae of normal size, shape and position in the ear (F–J), and three cristae (F'–J'). Lateral views; anterior to the left. Cyc, cyclopamine. Scale bar in A, 50  $\mu$ m (applies to A–E); scale bar in F, 50  $\mu$ m (applies to F–J').

909

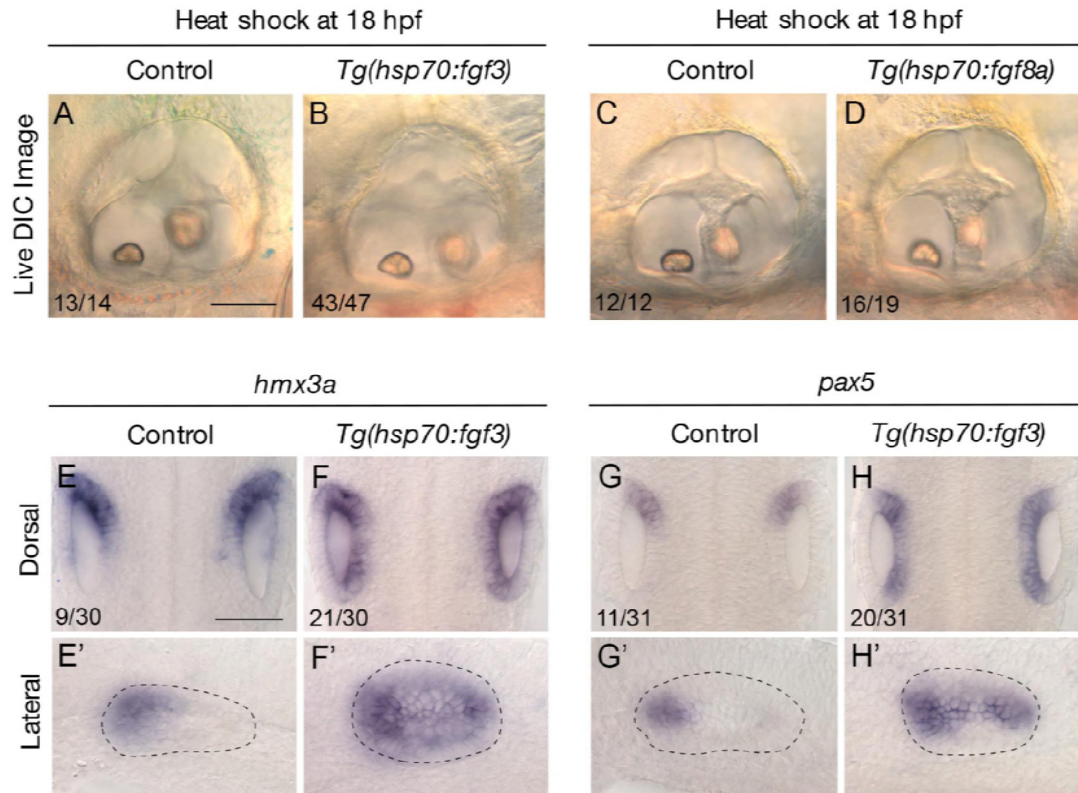

910

911

912

913

914

915

916

917

918

919

920

921

922

923

924

**Figure 1—Supplemental file 2. Effects of late mis-expression of *fgf* genes on otic patterning**

(A–D) Differential interference contrast (DIC) images of ears in live embryos at 3 dpf (72 hpf); lateral views with anterior to the left. Control embryos are non-transgenic siblings subjected to the same heat-shock treatment at 18 hpf. Representative phenotypes are shown; numbers of embryos showing the phenotype are indicated on each panel. Note the relatively normal size and shape of the ears after heat shock in transgenic animals. The focal plane for all panels is at the level of the anterior otolith; note that the posterior otolith (out of focus) is positioned dorsomedially, relative to the anterior otolith, in both control and transgenic ears. (E–H') In situ hybridisation for *hmx3a* (E–F') and *pax5* (G–H') at 22.5 hpf. Note the expansion of expression for both markers after heat shock of transgenic animals. E–H are dorsal views showing both ears; E'–H' are lateral views with anterior to the left. Scale bar in A, 50  $\mu$ m (applies to A–D); scale bar in E, 50  $\mu$ m (applies to E–H').



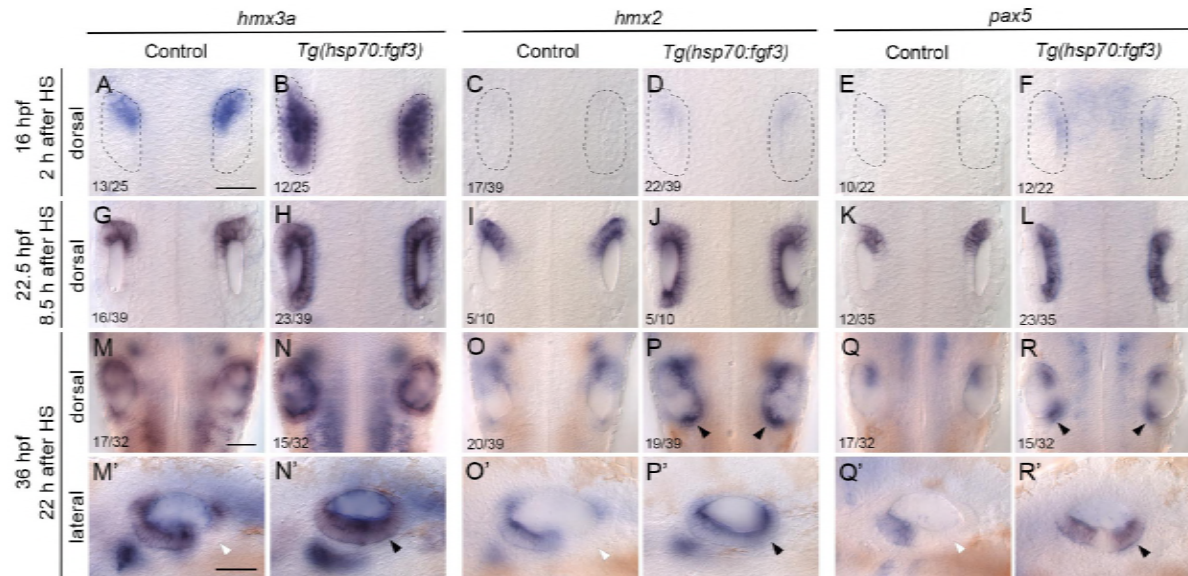

925  
926  
927  
928  
929  
930  
931  
932  
933  
934  
935  
936  
937  
938  
939  
940  
941  
942  
943  
944  
945  
946  
947  
948  
949

**Figure 2. Expression of the otic anterior marker genes *hmx3a*, *hmx2* and *pax5* after early *fgf3* mis-expression**

In situ hybridisation of otic expression patterns in *Tg(hsp70:fgf3)* embryos following a 30-minute heat shock (HS) at the 10-somite stage (14 hpf). Controls (left-hand panels of each pair of images) were sibling non-transgenic embryos subjected to the same heat shock. Numbers in the dorsal view panels indicate the number of embryos with the phenotype shown and total number (e.g. 13/25) from a mixed batch of transgenic and non-transgenic embryos in each pair of panels; 50% of the batch was expected to be transgenic. **(A–F)** Two hours after heat shock (16 hpf), expression of *hmx3a* expanded to cover the entire otic region (B), but there was only a trace of expression of *hmx2* or *pax5* in the otic placode at this stage. Weak expression of *pax5* in the hindbrain after heat shock (F) did not persist (L). **(G–L)** At 22.5 hpf (8.5 hours after HS), expression of all three genes had now expanded to cover the entire anteroposterior axis of the otic vesicle on the medial side. **(M–R’)** At 36 hpf (22 hours after HS), expression of *hmx3a* remained expanded across the otic anteroposterior axis (N,N’); expression of *hmx2* was strong at the anterior and posterior poles, and weaker in central regions (P,P’), whereas expression of *pax5* resolved into two discrete domains at the anterior and posterior poles of the otic vesicle, and was lost from central regions (R,R’). White arrowheads indicate regions that are normally free of expression in controls; black arrowheads mark ectopic expression in transgenic embryos. A–R are dorsal views showing both otic vesicles, with anterior to the top; M’–R’ are lateral views with anterior to the left. Scale bars, 50  $\mu$ m (scale bar in A applies to A–L; in M applies to M–R; in M’ applies to M’–R’). For additional examples and time points for *hmx2*, see Fig. 2—Supplemental File 2; for *pax5*, see Fig. 2—Supplemental File 3.

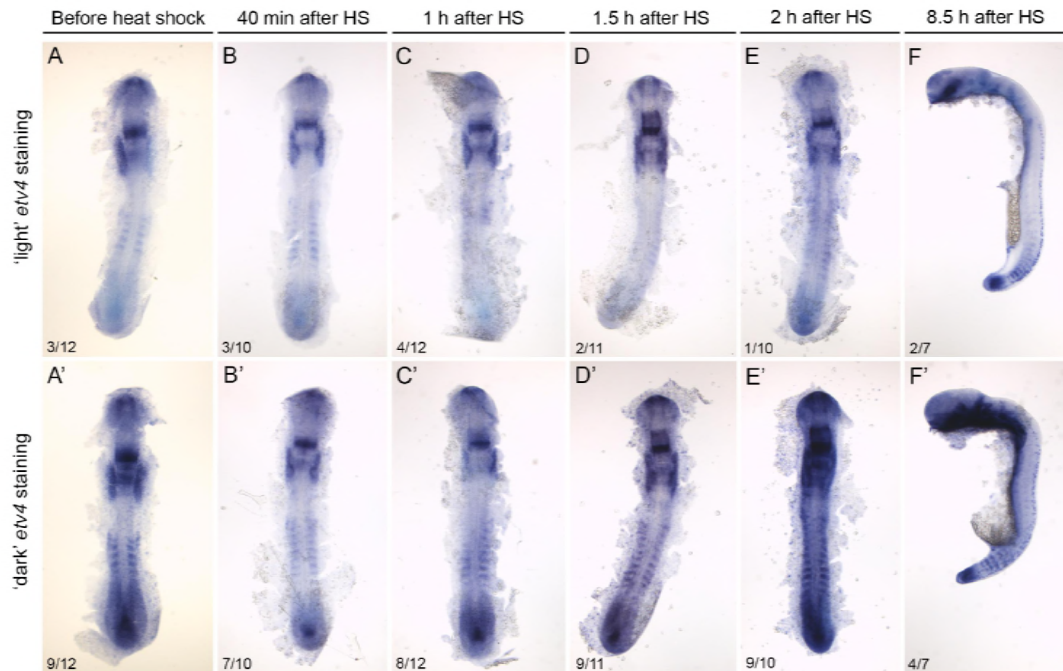

950

951 **Figure 2—Supplemental file 1. Time-course of expression of *etv4* mRNA after heat**  
952 **shock in *Tg(hsp70:fgf3)* embryos**

953 Embryos were heat-shocked for 30 minutes at 39°C at 14 hpf (the 10-somite stage), fixed at  
954 various times after the onset of heat shock as shown (top), and processed for in situ  
955 hybridisation for *etv4*. All embryos were stained and photographed using bright field optics  
956 under identical conditions, and scored as having 'light' or 'dark' expression (presumed  
957 transgenic and non-transgenic embryos, respectively; 75% of the batch was expected to be  
958 transgenic). Number of embryos with the phenotype shown and total number in the batch are  
959 shown directly on the panels (e.g. 3/12). Expression levels at the 10-somite stage before  
960 heat shock (A,A') were very variable, possibly due to leaky expression of the transgene, but  
961 corresponded to the published spatial pattern of expression (Thisse and Thisse, 2004).  
962 Robust, systemic up-regulation of *etv4* was seen in embryos 2 hours after heat shock (E,E').  
963 This persisted 8.5 hours after heat shock; here, 4/5 presumed transgenic embryos with  
964 abnormal morphology also had strong *etv4* expression (F'). Morphology was normal in  
965 presumed non-transgenic siblings showing the endogenous expression pattern of *etv4* (F).  
966 F,F' show lateral views; all other panels are dorsal views of flat-mounted embryos.  
967

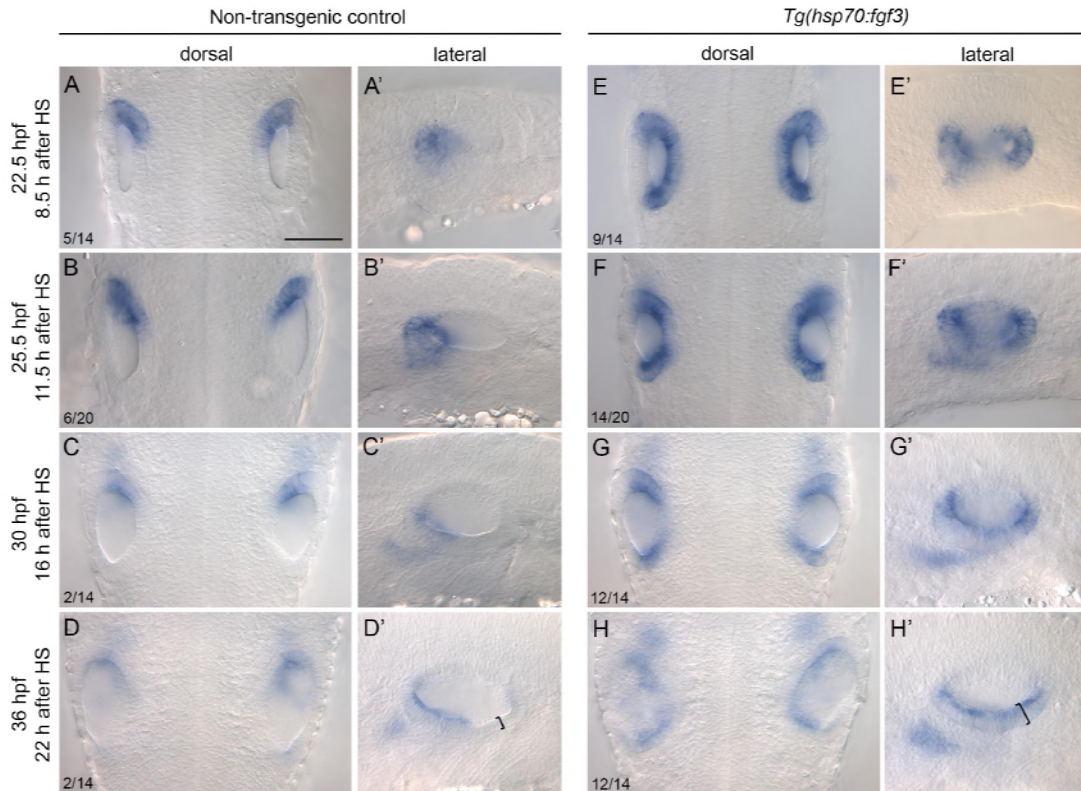

968  
969  
970  
971  
972  
973  
974  
975  
976  
977  
978  
979  
980  
981  
982  
983

**Figure 2—Supplemental file 2. Detailed time-course of expression of *hmx2* after early *fgf3* mis-expression**

In situ hybridisation of otic expression of *hmx2* in *Tg(hsp70:fgf3)* embryos following a 30-minute heat shock (HS) at the 10-somite stage (14 hpf). Controls (A–D') were sibling non-transgenic embryos subjected to the same heat shock. Numbers in the dorsal view panels indicate the number of embryos with the phenotype shown and total number (e.g. 5/14) from a mixed batch of transgenic and non-transgenic embryos in each pair of panels; 75% of the batch was expected to be transgenic. The first and last rows are biological replicates of data shown in Fig. 2. Note the weakening of expression in central medial otic epithelium by 25.5 hpf in transgenic embryos. By 36 hpf, in a lateral view, *hmx2* is expressed throughout the ventral floor of the otic vesicle in transgenic embryos, associated with a thicker epithelium in posterolateral regions (D', H', brackets). All dorsal views show anterior to the top; all lateral views show anterior to the left. Scale bar in A, 50  $\mu$ m (applies to all panels).



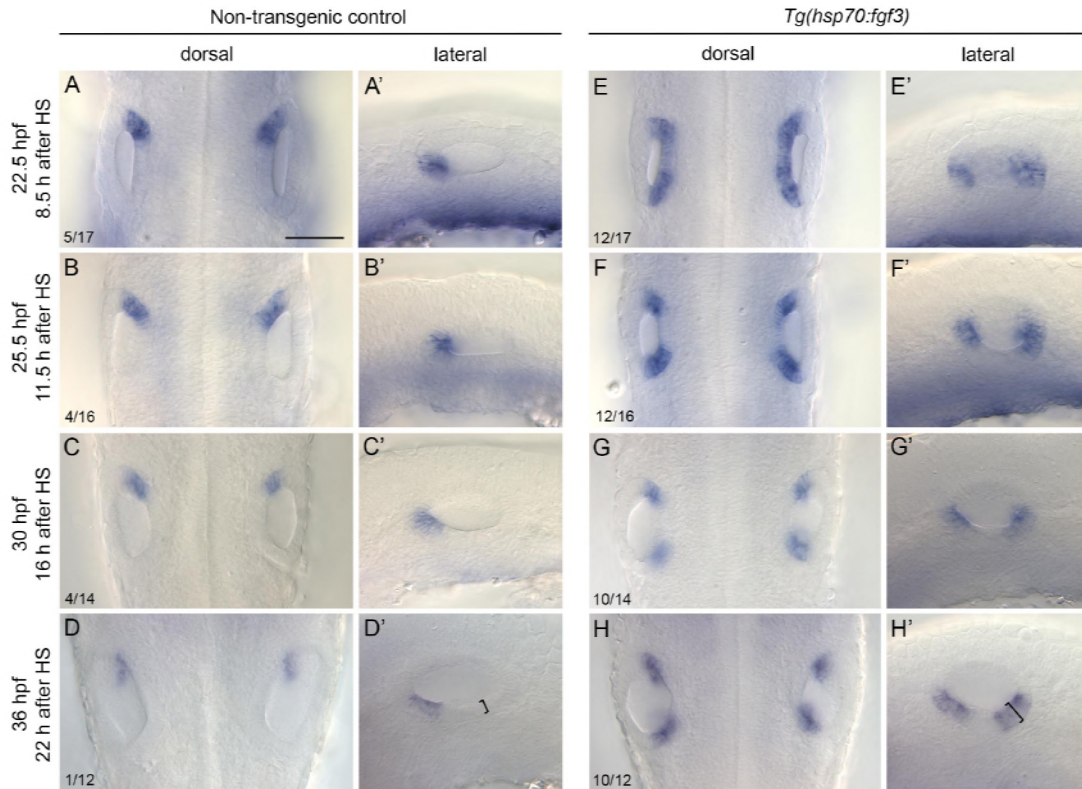

984  
985  
986  
987  
988  
989  
990  
991  
992  
993  
994  
995  
996  
997  
998

**Figure 2—Supplemental file 3. Detailed time-course of expression of *pax5* after early *fgf3* mis-expression**

In situ hybridisation of otic expression of *pax5* in *Tg(hsp70:fgf3)* embryos following a 30-minute heat shock (HS) at the 10-somite stage (14 hpf). Controls (A–D') were sibling non-transgenic embryos subjected to the same heat shock. Numbers in the dorsal view panels indicate the number of embryos with the phenotype shown and total number (e.g. 5/17) from a mixed batch of transgenic and non-transgenic embryos in each pair of panels; 75% of the batch was expected to be transgenic. The first and last rows are biological replicates of data shown in Fig. 2. Note that the ectopic expression in transgenic embryos has already resolved into two domains by 25.5 hpf, and two discrete domains persist at 36 hpf. At 36 hpf, in a lateral view, the ectopic domain of *pax5* is associated with a thicker epithelium (D', H', brackets). One embryo at 36 hpf was unable to be scored. All dorsal views show anterior to the top; all lateral views show anterior to the left. Scale bar in A, 50  $\mu$ m (applies to all panels).

999  
1000

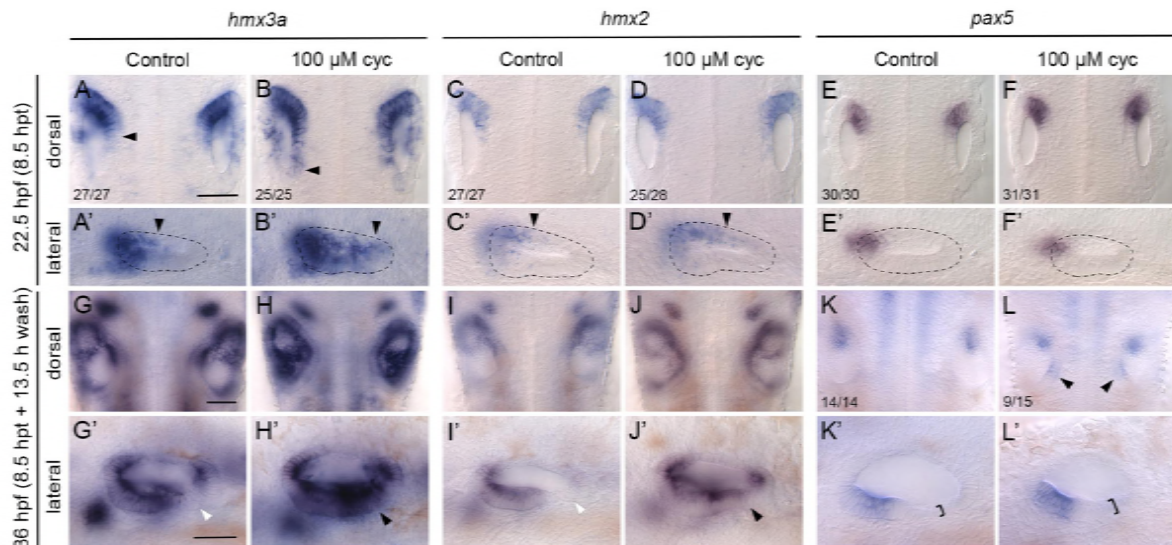

1001  
1002  
1003  
1004  
1005  
1006  
1007  
1008  
1009  
1010  
1011  
1012  
1013  
1014  
1015  
1016  
1017  
1018  
1019  
1020

**Figure 3. Expression of the otic anterior marker genes *hmx3a*, *hmx2* and *pax5* after Hh pathway inhibition**

Expression of mRNA for anterior otic markers in embryos treated with 100  $\mu$ M cyclopamine (cyc) from the 10-somite stage (14 hpf) until 22.5 hpf. Controls in the left-hand panels of each pair of images were treated with vehicle (ethanol) only. **(A–F')** At 22.5 hpf (8.5 hours post initiation of treatment, hpt), expression of *hmx3a* expanded into posterior regions of the otic vesicle (arrowheads); expression of *hmx2* showed a modest expansion and there was no change in the otic expression pattern of *pax5*. Arrowheads in A–D' indicate posterior extent of otic expression. **(G–L')** At 36 hpf (8.5 hpt + 13.5 h wash), expression of both *hmx3a* and *hmx2* extended into posteroventral regions of the otic epithelium. White arrowheads indicate regions that are normally free of expression in controls; black arrowheads mark ectopic expression in cyclopamine-treated embryos. By 36 hpf, expression of *pax5* appeared in a new discrete domain in posteromedial otic epithelium after cyclopamine treatment (L, arrowheads); in a lateral view, the epithelium in posterolateral regions was thicker than normal (K',L', brackets). A–L are dorsal views showing both otic vesicles, with anterior to the top; A'–L' are lateral views with anterior to the left. Scale bars, 50  $\mu$ m (scale bar in A applies to A–F'; in G applies to G–L; in G' applies to G'–L').

1021

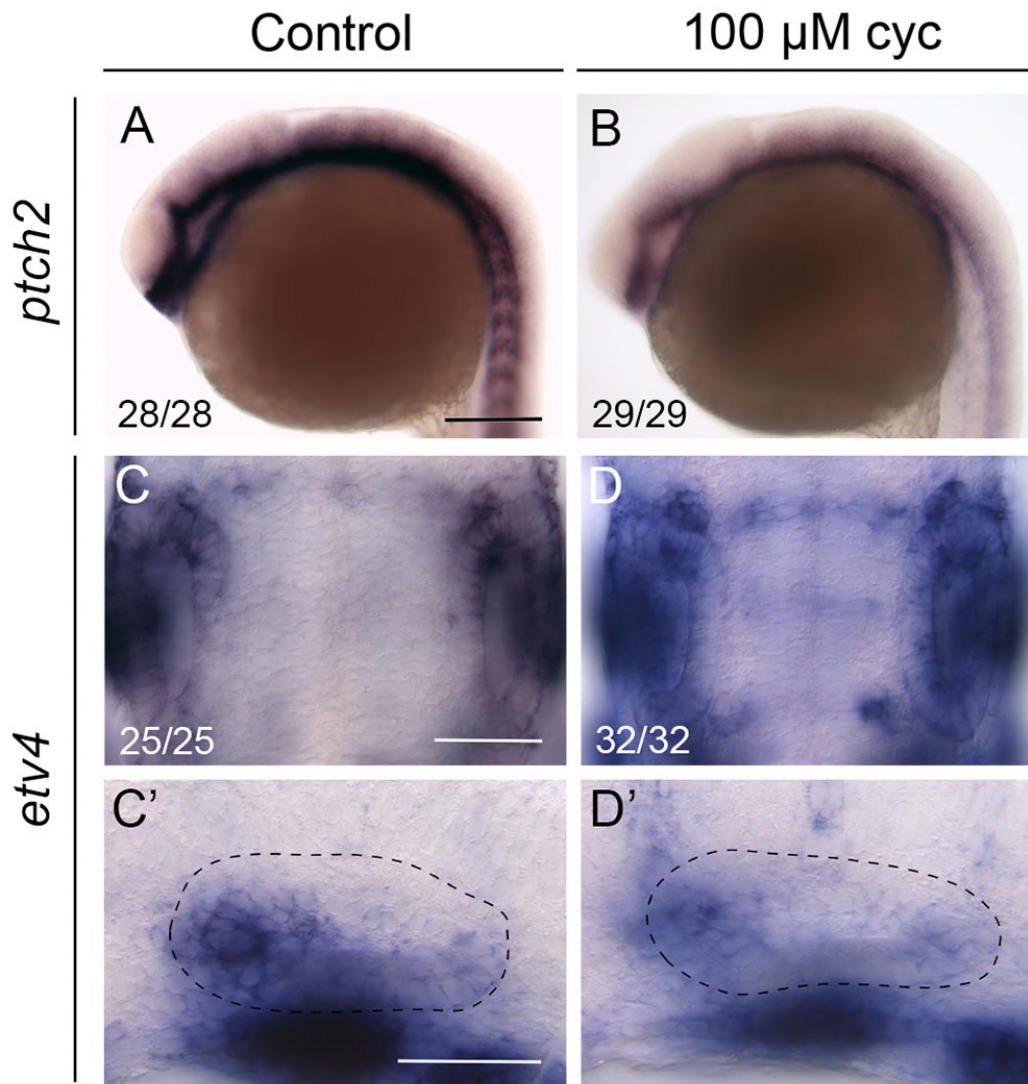

1022  
1023  
1024  
1025  
1026  
1027  
1028  
1029  
1030  
1031  
1032  
1033  
1034  
1035

**Figure 3—Supplemental file 1. Expression of target genes of the Hh and Fgf pathways after cyclopamine treatment**

(A,B) In situ hybridisation for the Hh pathway target gene *ptch2* at 22.5 hpf, after treatment from 14.5 hpf with vehicle (ethanol) only (A) or 100  $\mu$ M cyclopamine (cyc; B). The head and yolk of the embryo are shown. Lateral views; anterior to the left. Expression is reduced but not abolished in cyclopamine-treated embryos (B). (C–D') In situ hybridisation for the Fgf target gene *etv4* at 22.5 hpf, after treatment from 14.5 hpf with vehicle (ethanol) only (C,C') or 100  $\mu$ M cyclopamine (cyc; D,D'). There are no major changes to the otic expression of *etv4* at this stage after cyclopamine treatment. C,D show dorsal views of the two otic vesicles with anterior to the top; C',D' are lateral views of the otic vesicle with anterior to the left. Scale bar in A, 200  $\mu$ m (applies to B); scale bar in C, 50  $\mu$ m (applies to D); scale bar in C', 50  $\mu$ m (applies to D').



1036

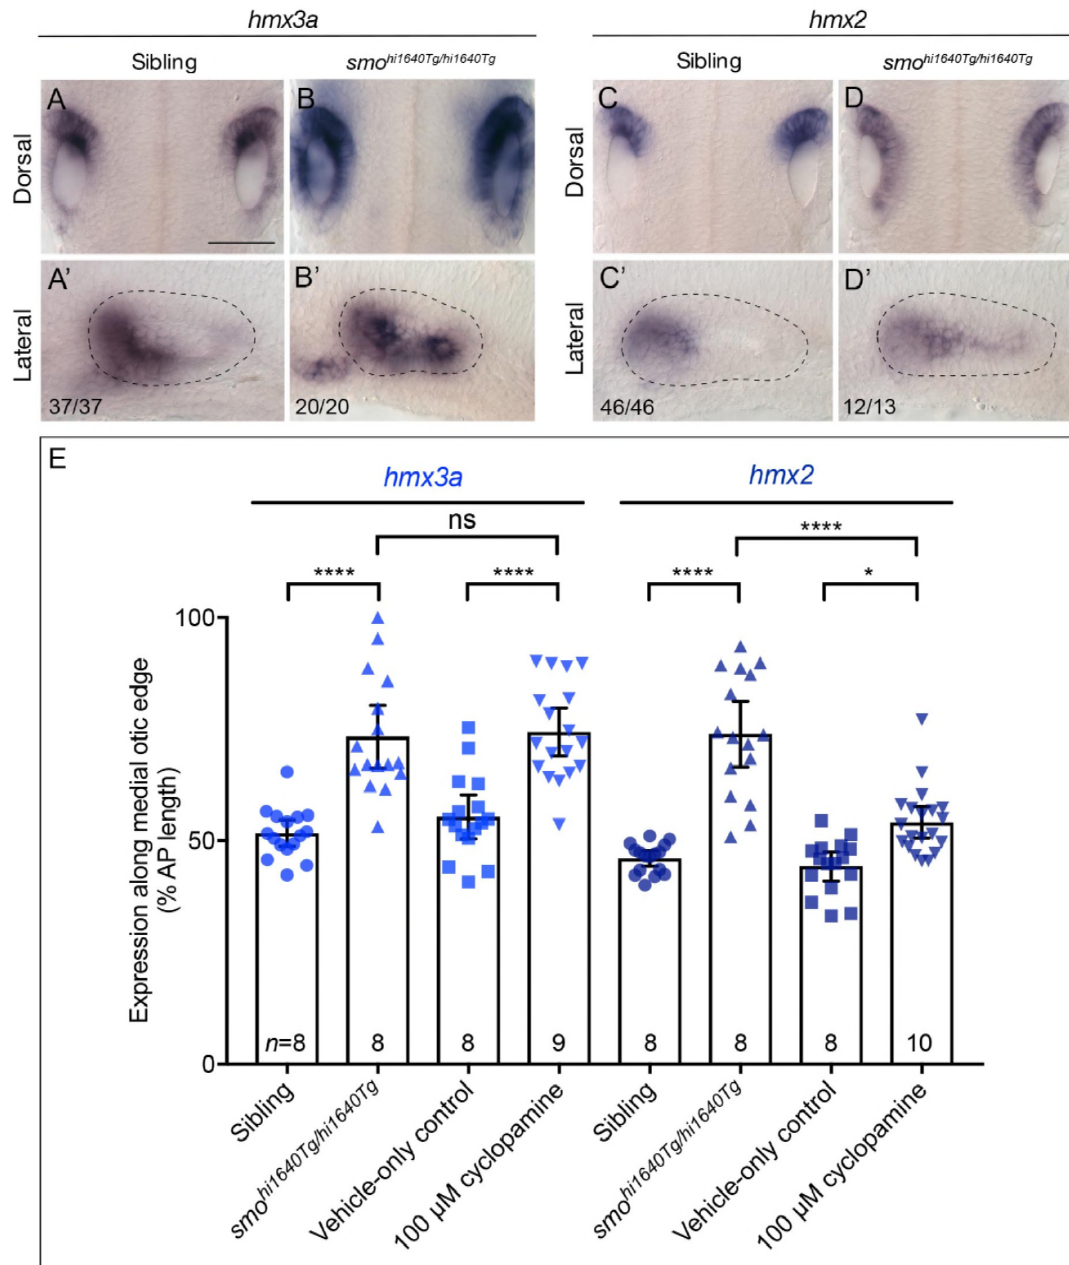

1037  
1038  
1039  
1040  
1041  
1042  
1043  
1044  
1045  
1046  
1047  
1048  
1049  
1050  
1051  
1052  
1053  
1054



1055  
1056

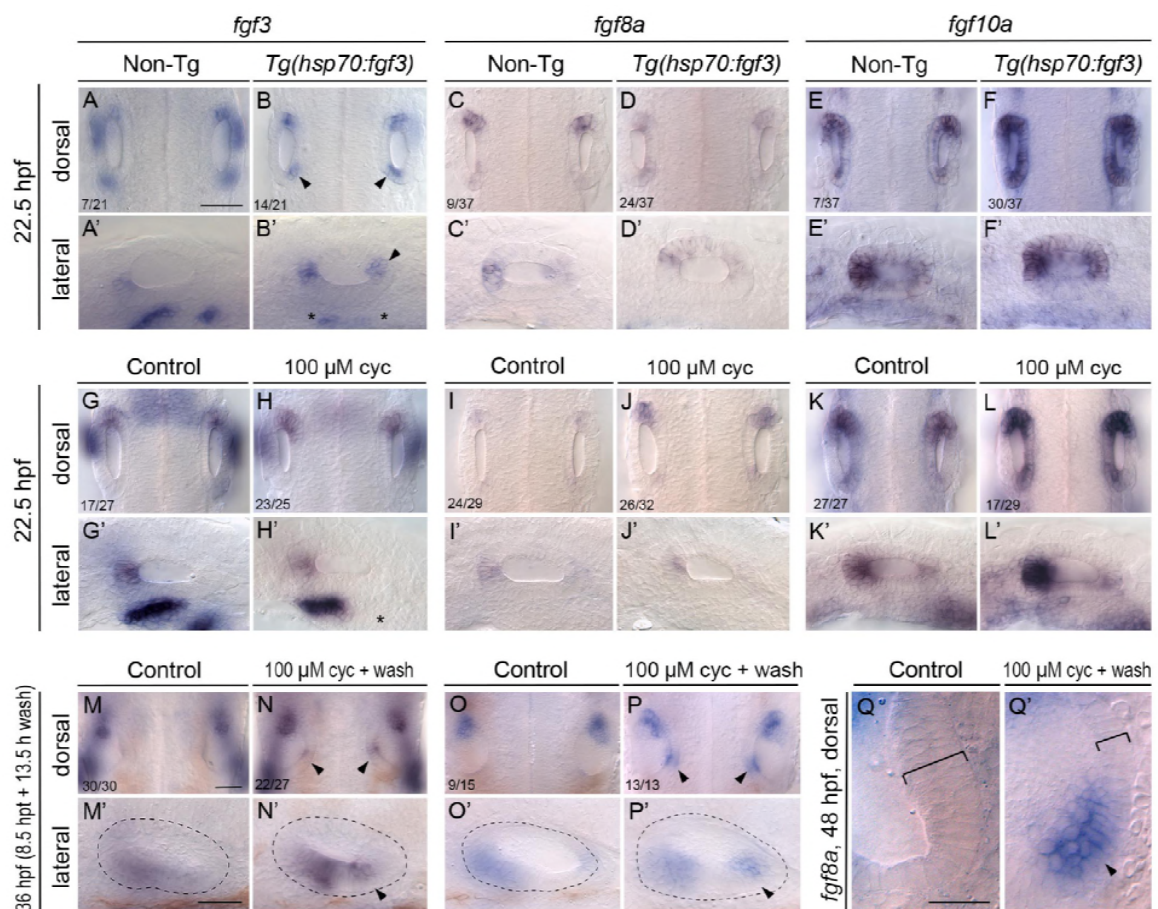

1057  
1058  
1059  
1060  
1061  
1062  
1063  
1064  
1065  
1066  
1067  
1068  
1069  
1070  
1071  
1072  
1073  
1074  
1075  
1076  
1077  
1078  
1079  
1080  
1081  
1082  
1083  
1084  
1085

**Figure 4. Otic expression of *fgf* genes following mis-expression of *fgf3* or inhibition of Hh signalling**

(A-F') In situ hybridisation for otic expression of *fgf* genes in *Tg(hsp70:fgf3)* embryos following a 30-minute heat shock (HS) at the 10-somite stage (14 hpf). Controls (left-hand panels of each pair of images) were sibling non-transgenic (Non-Tg) embryos subjected to the same heat shock. Numbers of embryos shown in the dorsal view panels indicate the number showing the phenotype from a mixed batch of transgenic and non-transgenic embryos in each pair of panels; 75% of the batch is expected to be transgenic. A-B' show staining with a probe specific to the 3' UTR of *fgf3*: note the ectopic patch of endogenous *fgf3* expression at the posterior otic pole (B,B'; arrowheads) and disruption of *fgf3* expression ventral to the otic vesicle (B'; asterisks) after heat shock in transgenic embryos. Expression of *fgf10a* is strengthened in the otic vesicle of transgenic embryos after heat shock (E-F'). (G-Q') Expression of mRNA for *fgf* genes in embryos treated with 100  $\mu$ M cyclopamine (cyc) from the 10-somite stage (14 hpf) until 22.5 hpf. Controls in the left-hand panels of each pair of images were treated with vehicle (ethanol) only. Numbers of embryos with the phenotype shown for individual treatments are indicated in the dorsal view panels. There was little change to the otic expression patterns of *fgf3* or *fgf8a* at 22.5 hpf (8.5 hours post treatment) (G-J'), but note the loss of *fgf3* expression ventral to the ear (H'; asterisk). Expression of *fgf10a* in the otic vesicle was strengthened after inhibition of Hh signalling in about 50% of treated embryos (L,L'). At 36 hpf (8.5 hpt + 13.5 h wash), ectopic expression of both *fgf3* and *fgf8a* appeared in a new posteromedial domain in the ears of cyclopamine-treated embryos (M-P'; arrowheads). (Q,Q') Expression of *fgf8a* in the posterior of the otic vesicle at 48 hpf (8.5 hpt + 25.5 h wash). Ectopic expression has strengthened (arrowhead) and medial epithelium is thinner than normal (brackets). Dorsal views, with anterior to the top. Scale bar in A, 50  $\mu$ m (applies to A-L); scale bar in A', 50  $\mu$ m (applies to A'-L'); scale bar in M, 50  $\mu$ m (applies to M-P); scale bar in M', 50  $\mu$ m (applies to M'-P'); scale bar in Q, 20  $\mu$ m (applies to Q,Q').

1086  
1087

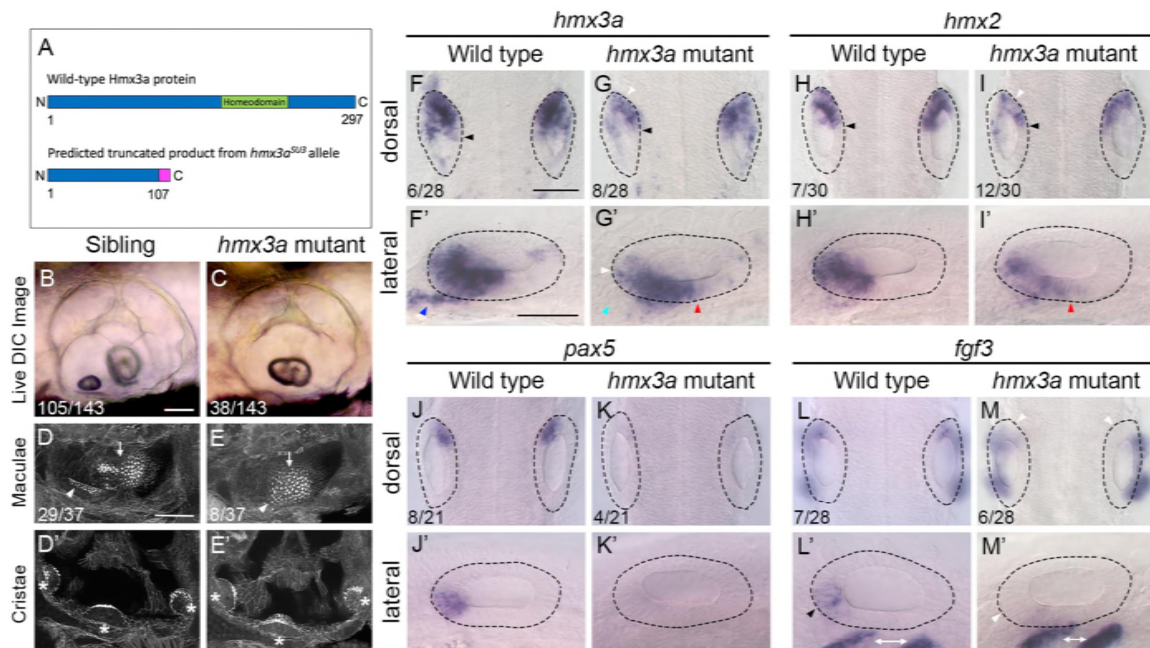

1088  
1089  
1090  
1091  
1092  
1093  
1094  
1095  
1096  
1097  
1098  
1099  
1100  
1101  
1102  
1103  
1104  
1105  
1106  
1107  
1108  
1109  
1110  
1111  
1112  
1113  
1114  
1115  
1116

**Figure 5. Fused otoliths and sensory maculae, and reduction of anterior otic character, in  $hmx3a^{SU3/SU3}$  mutants**

(A) Schematic diagram showing the predicted truncated product for the  $hmx3a^{SU3}$  allele. The mutation was generated using a CRISPR sgRNA targeting sequence in exon 2 upstream of the DNA-binding homeodomain (green). The predicted truncated protein produced by the  $hmx3a^{SU3/SU3}$  allele contains a Thr to Gly substitution at amino acid 107, followed by a stretch of 10 further incorrect amino acids (magenta). The truncated protein lacks the homeodomain. (B,C) Differential interference contrast (DIC) images of ears in live embryos at 3 dpf (72 hpf). Numbers of embryos in a batch from a mating between heterozygous parents are given. Note the fused otolith in the  $hmx3a^{SU3/SU3}$  mutant ear (C). (D–E') FITC-phalloidin stains of the sensory maculae (D,E) and cristae (D',E') in the ear at 3 dpf (72 hpf). Numbers of embryos showing the phenotype from a cross between heterozygous parents are shown. White arrowhead: anterior macula; white arrow: posterior macula; asterisks indicate cristae. Additional examples are shown in Fig. 5—Supplemental file 1. (F–M') In situ hybridisation for otic anterior markers at 24 hpf in genotyped wild-type and  $hmx3a^{SU3/SU3}$  mutant embryos. The dotted outline marks the outer edge of the otic epithelium. Black arrowheads in F–I indicate the extent of  $hmx$  expression in medial epithelium; white arrowheads indicate areas of reduced expression levels; blue arrowhead in F' marks presumed otic or anterior lateral line neuroblasts; light blue arrowhead in G' indicates loss of expression in this area; red arrowheads in G',I' mark expansion of expression in ventral otic epithelium. Black arrowhead in L' indicates anterior otic expression domain of  $fgf3$ , lost in M,M' (white arrowheads); white double-headed arrows mark expression of  $fgf3$  in pharyngeal pouch endoderm. Numbers in panels F–M indicate numbers of embryos genotyped as either wild type or homozygous mutant that showed the representative expression patterns illustrated. Scale bars, 50  $\mu$ m (scale bar in B applies to B,C; scale bar in D applies to D–E'; scale bar in F applies to F–I, J–M; scale bar in F' applies to F'–I', J'–M').



1117

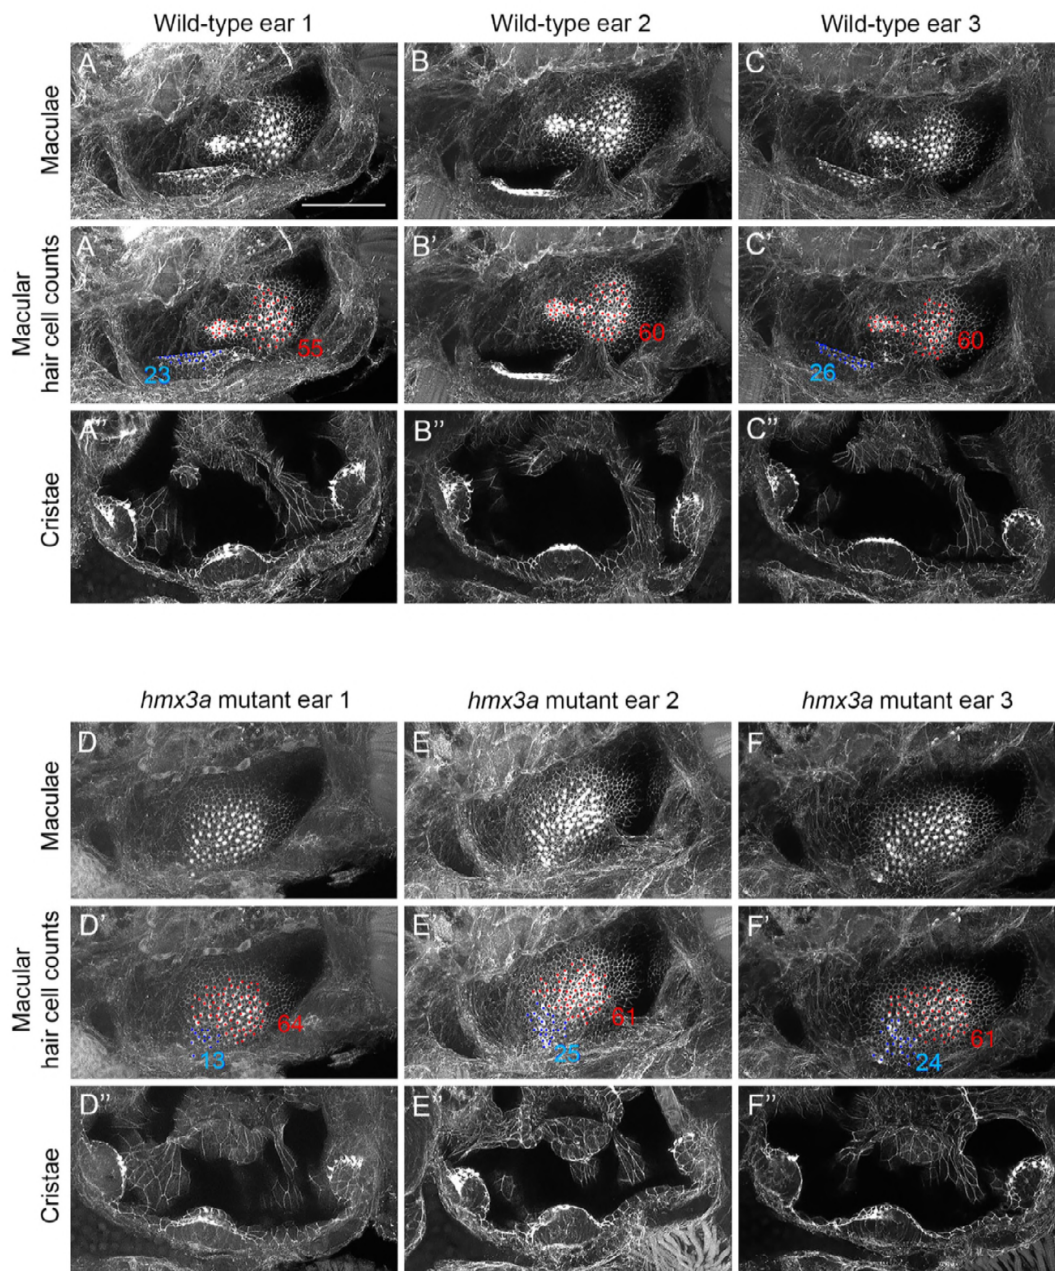

1118

1119

1120

1121

1122

1123

1124

1125

1126

1127

1128

1129

1130

1131

1132

1133

1134

**Figure 5—Supplemental file 1. Maculae are fused, but cristae are normal, in  $hmx3a^{SU3/SU3}$  mutant ears**

(A–F'') Confocal images of FITC-phalloidin-stained ears at 3 dpf (72 hpf); maximum intensity projections of selected z-stacks. Three ears were imaged for each genotype; note the fused maculae, but normal presence of three cristae, in each of the mutant ears (D–F''). The middle row of panels in each set is a duplicate of the panels above, with counts for visible hair cells in the anterior macula (blue) and posterior macula (red). The distinction between the anterior and posterior parts of the fused macula in panels D'–F' was estimated based on hair cell position. Anterior macula counts in the wild-type samples are likely to be underestimates, as only some of the hair cells were visible in this orientation. It was not possible to distinguish any individual hair cells in the anterior macula in wild-type ear 2 (B'). The number of ears imaged was too small to draw firm conclusions about any changes in hair cell number in either macula. Note that the panels for wild-type ear 3 and  $hmx3a^{SU3/SU3}$  mutant ear 3 are reproduced in Fig. 5. Scale bar, 50  $\mu$ m (applies to all panels).

1135

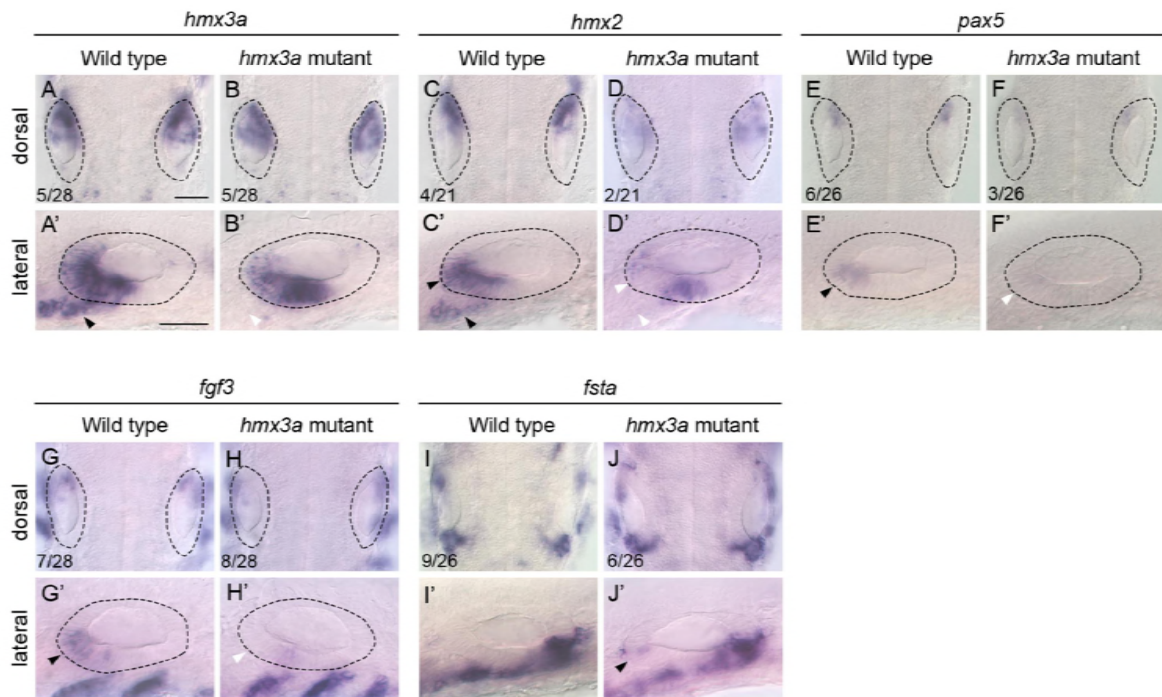

1136

1137

1138

1139

1140

1141

1142

1143

1144

1145

1146

1147

1148

**Figure 5—Supplemental file 2. Expression of otic markers at 27–30 hpf in *hmx3a*<sup>SU3/SU3</sup> mutants**

(A–H') Reduction in expression of anterior otic markers in the otic vesicle of *hmx3a*<sup>SU3/SU3</sup> mutants at 27 hpf. Black arrowheads mark expression domains in wild-type ears and in presumptive neuroblasts anteroventral to the ear that are reduced or missing in mutants (white arrowheads). (I–J') Expression of the posterior otic marker *follistatin-a* (*fsta*) in the otic vesicle at 30 hpf. Although weak *fsta* expression was detected in anterior otic epithelium in mutants (J', black arrowhead), levels were not above the natural variation seen in wild-type siblings. Numbers in panels A–J indicate numbers of embryos genotyped as either wild type or homozygous mutant that showed the representative expression patterns as illustrated. Scale bar in A, 50  $\mu$ m (applies to A–J); scale bar in A', 50  $\mu$ m (applies to A'–J').



1149  
1150

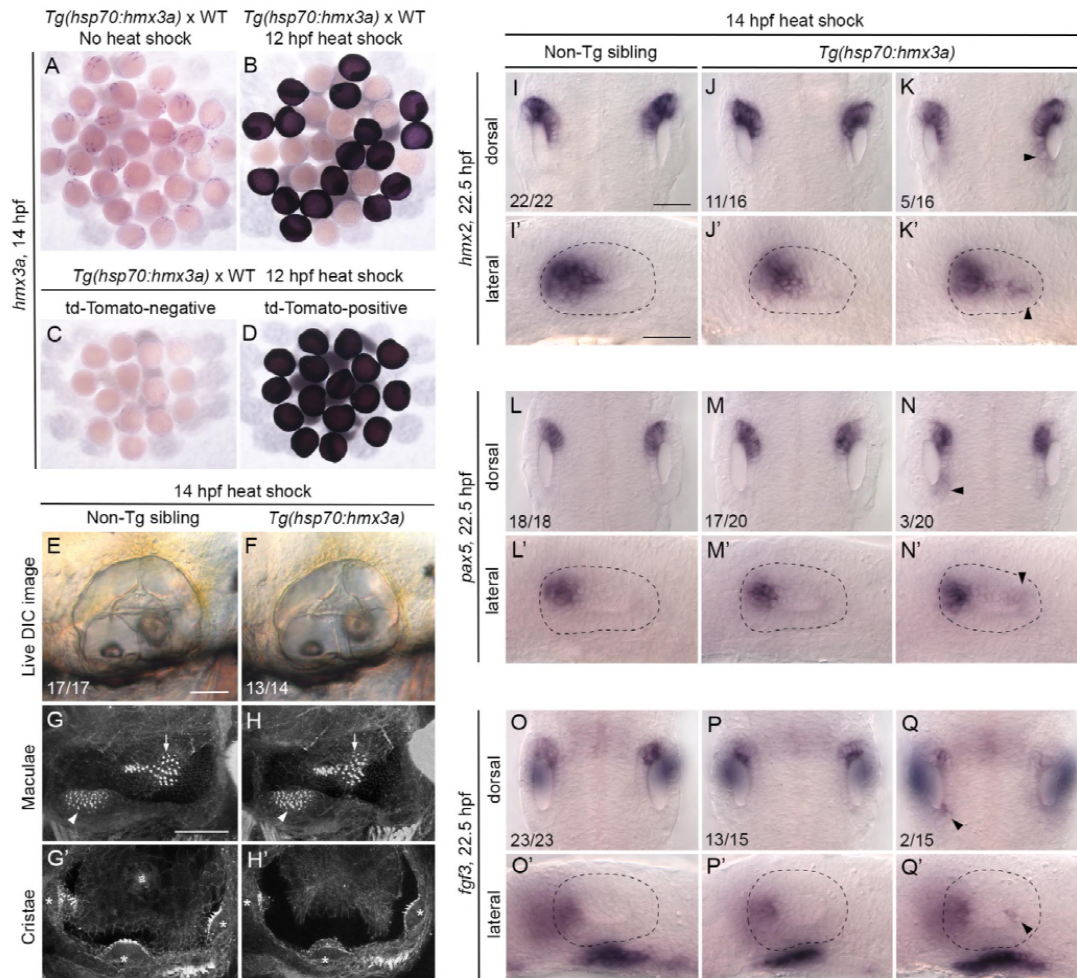

1151  
1152  
1153  
1154  
1155  
1156  
1157  
1158  
1159  
1160  
1161  
1162  
1163  
1164  
1165  
1166  
1167  
1168  
1169  
1170  
1171  
1172  
1173  
1174  
1175  
1176

**Figure 6. Mis-expression of *hmx3a* is not sufficient to generate an anterior ear duplication**

(A-D) Control experiments to check for successful expression of the *hmx3a* transgene after heat shock at 12 hpf. Embryos were fixed and stained by in situ hybridisation two hours later, at 14 hpf. (A,B) A mixed batch of embryos from a cross between a fish hemizygous for the transgene and a wild type (WT). All embryos (31/31) showed the normal pattern of expression of *hmx3a* in the absence of heat shock (A). After a 60-minute heat shock at 12 hpf, ~50% of the batch (17/30) showed strong, systemic expression of the transgene at 14 hpf, as expected (B). All embryos shown in B were stained in the same tube. (C,D) Embryos heat-shocked for 60 minutes at 12 hpf were sorted on the basis of tdTomato expression before fixing. All tdTomato-negative embryos (14/14) were also negative for expression of the *hmx3a* transgene (C); all tdTomato-positive embryos (16/16) were also positive for *hmx3a* transgene expression (D). (E,F) Live DIC images of ears of non-transgenic (E) and transgenic (F) sibling embryos at 3 dpf (72 hpf), after a 30-minute heat shock at 14 hpf. (G-H') Confocal images of FITC-phalloidin-stained ears at 3 dpf (72 hpf). Position and size of the two maculae (G,H, arrowheads and arrows) and three cristae (G'H', asterisks) were normal in both non-transgenic and transgenic sibling embryos after heat shock. (I-Q') In situ hybridisation for otic marker genes in non-transgenic and *Tg(hsp70:hmx3a)* sibling embryos after a 30-minute heat shock at 14 hpf. Dorsal views of both otic vesicles (I-Q) and lateral views of a single otic vesicle (I'-Q') are shown. Note weak ectopic expression of *hmx2* and *pax5*, and posterior otic expression of *fgf3*, in the otic vesicles of a minority of transgenic embryos (right hand column; arrowheads). Numbers of embryos showing the phenotypes are shown for each panel. WT, wild type (AB strain). Scale bar in E, 50  $\mu$ m (applies to E-F); scale bar in G, 50  $\mu$ m (applies to G-H'); scale bar in I, 50  $\mu$ m (applies to I-Q); scale bar in I', 50  $\mu$ m (applies to I'-Q').

1177

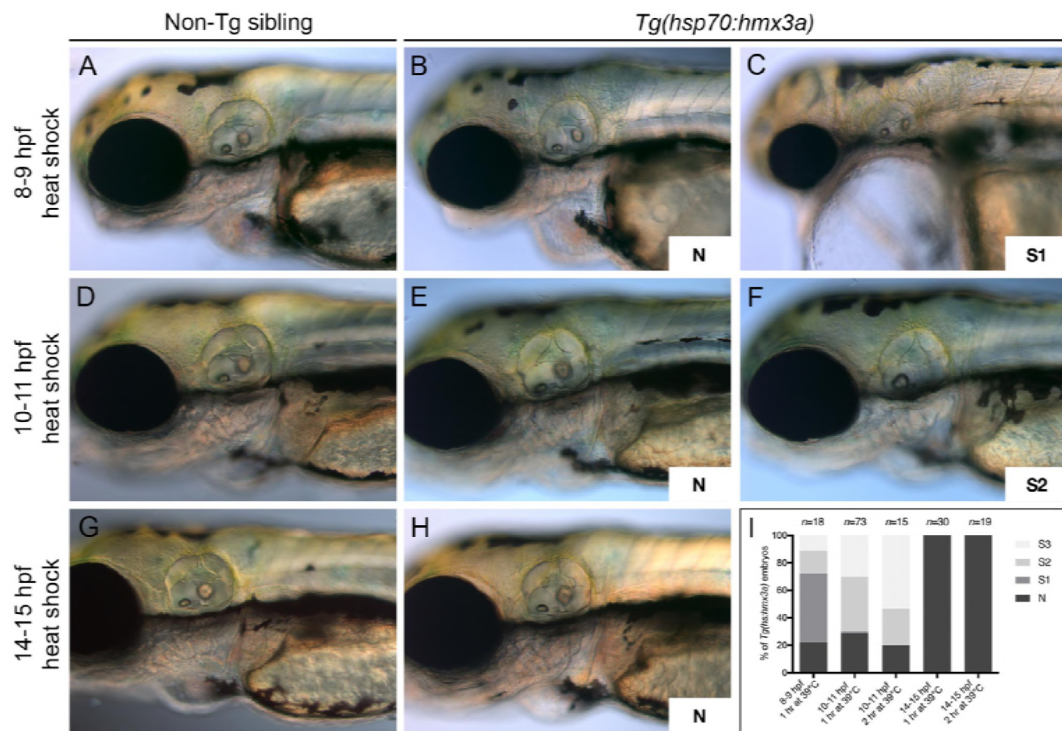

1178

1179

1180

1181

1182

1183

1184

1185

1186

1187

1188

**Figure 6—Supplemental file 1. Development of embryos and otic phenotypes after mis-expression of *hmx3a* at different time points**

(A-H) Transgenic *Tg(hsp70:hmx3a)* and non-transgenic sibling embryos were heat-shocked for 1 hour at the times indicated, and grown on to 3 dpf for examination of general morphology and any otic phenotype. Representative examples are shown. (I) Graphical representation of the results from 1- and 2-hour heat shocks. Abbreviations: N, normal positioning of both anterior (ventrolateral) and posterior (posteromedial) otoliths; S1 - anterior otolith in wild-type ventrolateral position but posterior otolith more ventrally positioned; S2 - single otolith in one ear with two wild-type positioned otoliths in the contralateral ear; S3 - single otolith in both ears; *n*, number of embryos.



1189  
1190

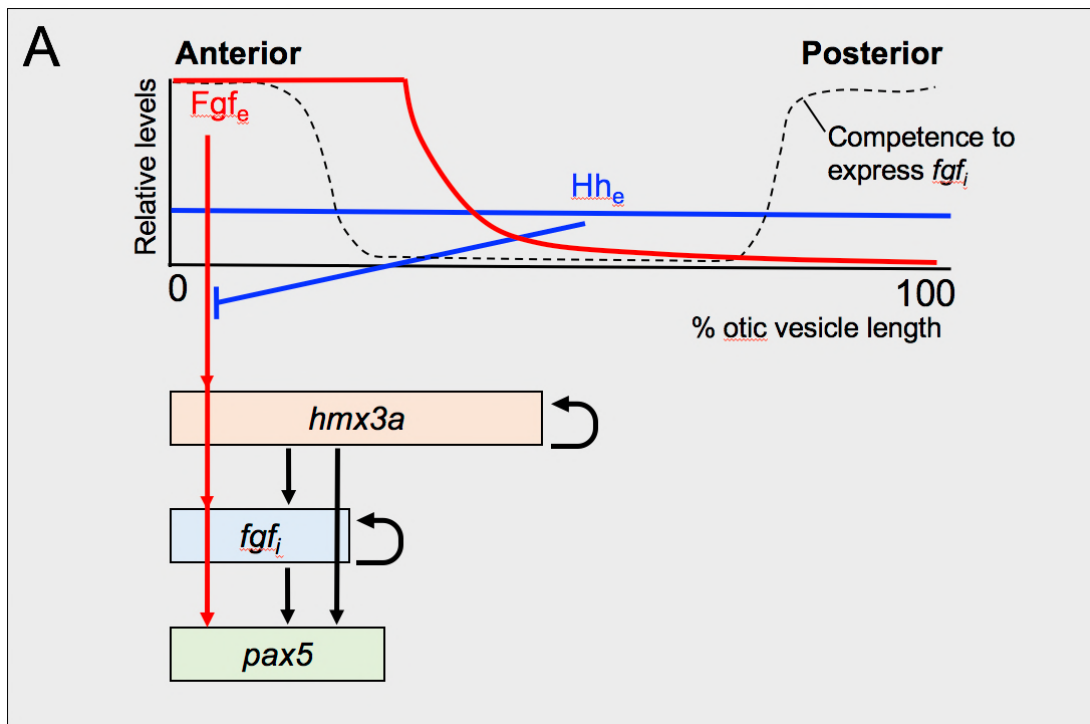

1191

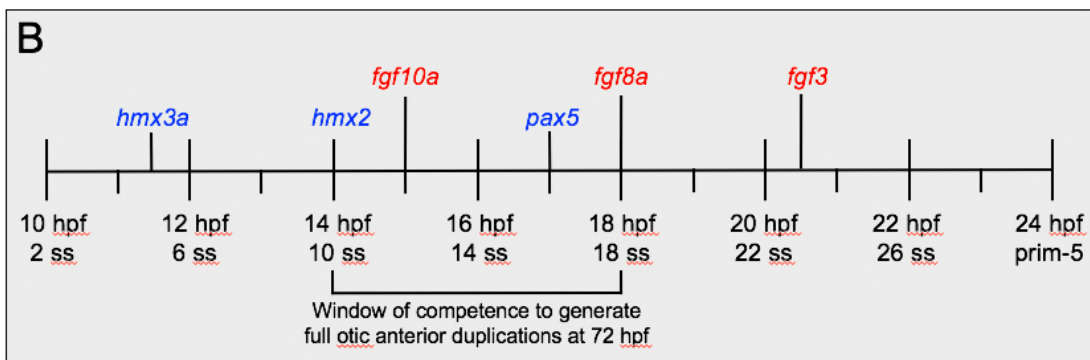

1192  
1193  
1194  
1195  
1196  
1197  
1198  
1199  
1200  
1201  
1202  
1203  
1204  
1205

**Figure 7. Proposed gene network and timeline for the acquisition of anterior identity in the zebrafish otic vesicle**

**(A)** Proposed gene regulatory network. **(B)** Schematic timeline showing sequential onset of expression of anterior markers in the zebrafish otic placode and vesicle. Diagrams in A and B are based on the results of this study, together with previously published data (Feng and Xu, 2010; Hammond et al., 2003; Hammond et al., 2010; Hammond and Whitfield, 2011; Kwak et al., 2006; Léger and Brand, 2002; Maier and Whitfield, 2014; McCarroll and Nechiporuk, 2013; Millimaki et al., 2007). Abbreviations:  $Fgf_e$ , extrinsic Fgf protein;  $fgf_i$ , intrinsic (otic vesicle)  $fgf$  gene expression;  $Hh_e$ , extrinsic Hedgehog protein; hpf, hours post fertilisation; ss, somite stage.

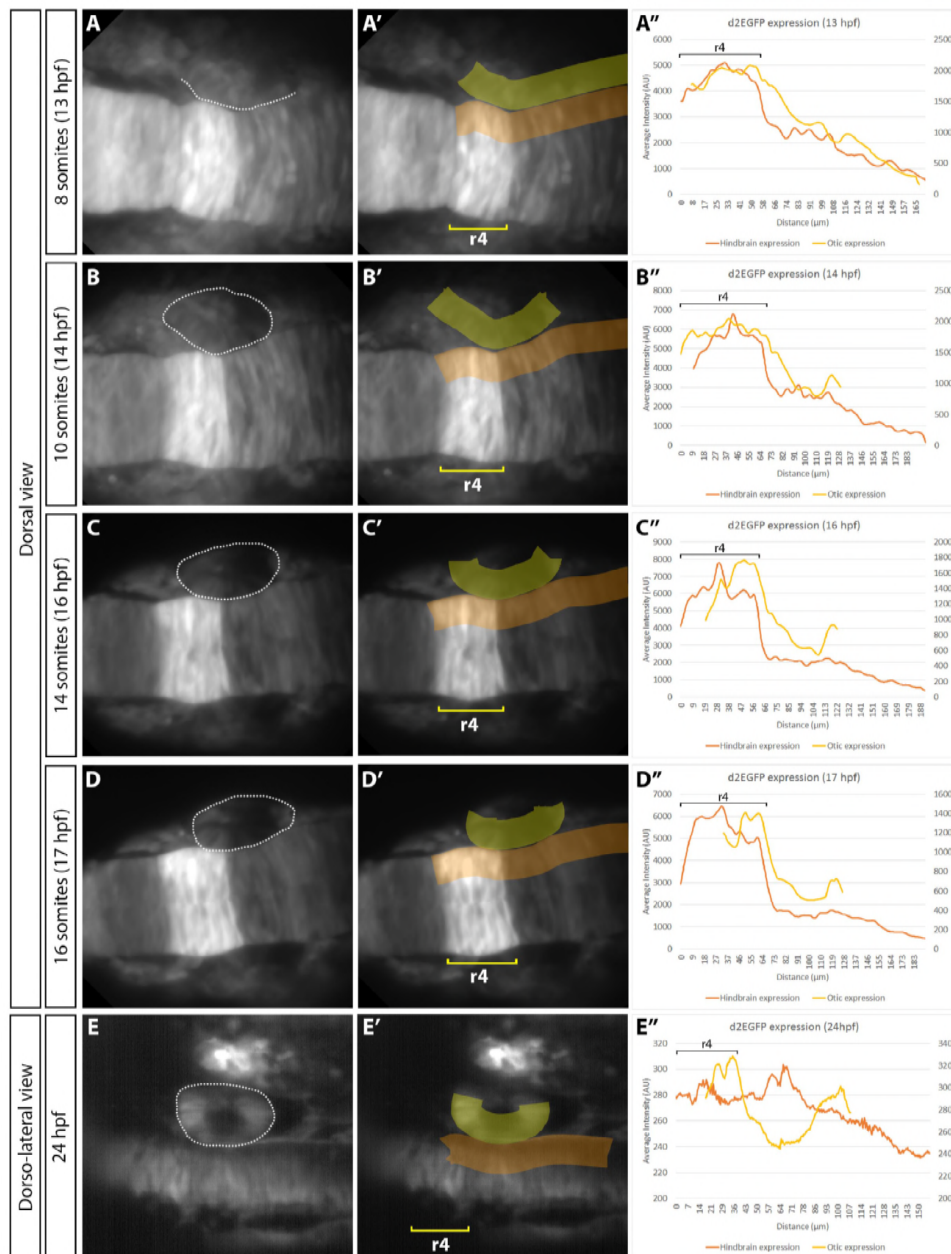

1206  
1207  
1208  
1209  
1210  
1211  
1212  
1213  
1214  
1215  
1216  
1217  
1218  
1219  
1220  
1221  
1222  
1223  
1224  
1225

**Figure 7—Supplemental file 1. Expression of a fluorescent reporter for Fgf activity in the hindbrain and otic placode** (A–E”) Light-sheet imaging and fluorescence measurements of a representative *Tg(dusp6:d2EGFP)* embryo from the 8-somite stage to the 16-somite stage (A–D), and a second representative embryo at 24 hpf (E). A dorsal view of the hindbrain and right-hand otic region (dotted outline) is shown; anterior is to the left. Rhombomere 4 (r4) expression is bright during the 8–16-somite stages. Expression levels were averaged over a 28.7  $\mu\text{m}$ -wide band, over 20 z-sections at intervals of 1  $\mu\text{m}$ , both in the hindbrain posterior to the r3/r4 boundary (orange; left-hand scale on graph) and otic region (yellow; right-hand scale on graph). Position of the otic region was estimated by tracing the dataset backwards from a stage when the otic vesicle was evident. At 24 hpf, expression of d2EGFP in r4 decreased, whereas the otic vesicle had high Fgf activity at both the anterior and posterior poles (E–E”). The measurements at 24 hpf were taken from a different embryo using a lower laser power, resulting in different arbitrary units on the graph (E”). At earlier stages, expression of d2EGFP in the otic region was much lower than that in the rhombomeres, but a graded expression (higher at the anterior, lower at the posterior) was evident between the 8- and 16-somite stages (A–D”). The images in A–D’ were taken from the dataset shown in [Supplemental Movie 1](#).

1226

1227

**Supplemental movie 1**

1228

Time-lapse movie of a representative *Tg(dusp6:d2EGFP)* embryo from the 8-somite stage to the 16-somite stage, used to generate panels A–D' in [Figure 7—Supplemental file 1](#). Images

1229

were captured by light-sheet microscopy every 5 minutes for 4 hours (from the 8- to the 16-

1230

somite stage). Individual time points were manually drift corrected. An average intensity

1231

projection of the fluorescent signal is shown (produced from 20 z-slices encompassing the

1232

otic region). A dorsal view is shown; anterior is to the top left. Scale bar, 50  $\mu\text{m}$ .

1233

1234

1235

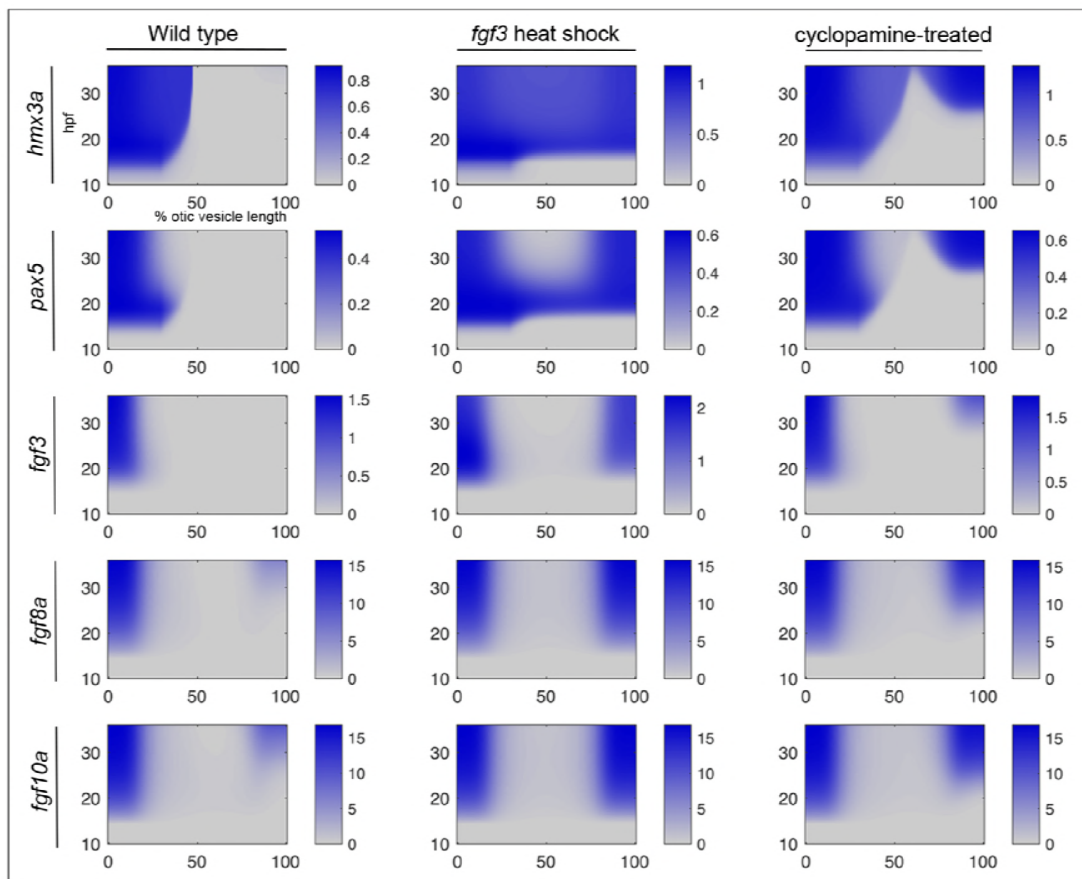

1236

1237

1238

1239

1240

1241

1242

1243

1244

1245

1246

1247

1248

**Figure 8. A model for the acquisition of anterior identity in the zebrafish otic vesicle**

Solutions of a differential equation-based model to describe gene expression dynamics of the proposed network. Endogenous mRNA expression levels (blue) are shown as a function of position along the otic anteroposterior axis (x axis; % otic vesicle length from the anterior end) and time (y axis; hpf). Levels are shown arbitrary units in the bars to the right of each panel. Exogenous *fgf3* mRNA from the transgene after heat shock is not shown. Left-hand column: wild type; middle column: with transient heat-shock induction of *fgf3* at 14 hpf; right-hand column: with inhibition of Hh signalling (cycloamine treatment from 14–22.5 hpf). For full details, see [Figure 8—Supplemental file 1](#).

**Figure 8—Supplemental file 1. Details of the mathematical model.** See appendix.

1249 **References**

- 1250 **Adamska, M., Léger, S., Brand, M., Hadrys, T., Braun, T. and Bober, E.** (2000).  
1251 Inner ear and lateral line expression of a zebrafish *Nkx5-1* gene and its  
1252 downregulation in the ears of FGF8 mutant, *ace*. *Mech. Dev.* **97**, 161-165.
- 1253 **Anwar, M., Tambalo, M., Ranganathan, R., Grocott, T. and Streit, A.** (2017). A  
1254 gene network regulated by FGF signalling during ear development. *Sci. Rep.*  
1255 **7**, 6162.
- 1256 **Bok, J., Raft, S., Kong, K. A., Koo, S. K., Dräger, U. C. and Wu, D. K.** (2011).  
1257 Transient retinoic acid signaling confers anterior-posterior polarity to the inner  
1258 ear. *Proc. Natl. Acad. Sci. USA* **108**, 161-166.
- 1259 **Briscoe, J. and Small, S.** (2015). Morphogen rules: design principles of gradient-  
1260 mediated embryo patterning. *Development* **142**, 3996-4009.
- 1261 **Chen, W., Burgess, S. and Hopkins, N.** (2001). Analysis of the zebrafish  
1262 smoothed mutant reveals conserved and divergent functions of hedgehog  
1263 activity. *Development* **128**, 2385-2396.
- 1264 **Ernest, S., Rauch, G.-J., Haffter, P., Geisler, R., Petit, C. and Nicolson, T.** (2000).  
1265 *Mariner* is defective in *myosin VIIA*: a zebrafish model for human hereditary  
1266 deafness. *Hum. Mol. Genet.* **9**, 2189-2196.
- 1267 **Feng, Y. and Xu, Q.** (2010). Pivotal role of *hmx2* and *hmx3* in zebrafish inner ear  
1268 and lateral line development. *Dev. Biol.* **339**, 507-518.
- 1269 **Gagnon, J., Valen, E., Thyme, S., Huang, P., Akhmetova, L., Pauli, A.,  
1270 Montague, T., Zimmerman, S., Richter, C. and Schier, A.** (2014). Efficient  
1271 mutagenesis by Cas9 protein-mediated oligonucleotide insertion and large-  
1272 scale assessment of single-guide RNAs. *PLoS One* **9**, e98186.
- 1273 **Gou, Y., Vemaraju, S., Sweet, E., Kwon, H. and Riley, B.** (2018). *sox2* and *sox3*  
1274 Play unique roles in development of hair cells and neurons in the zebrafish  
1275 inner ear. *Dev. Biol.* **435**, 73-83.
- 1276 **Hadrys, T., Braun, T., Rinkwitz-Brandt, S., Arnold, H.-H. and Bober, E.** (1998).  
1277 *Nkx5-1* controls semicircular canal formation in the mouse inner ear.  
1278 *Development* **125**, 33-39.
- 1279 **Hammond, K. L., Loynes, H. E., Folarin, A. A., Smith, J. and Whitfield, T. T.**  
1280 (2003). Hedgehog signalling is required for correct anteroposterior patterning  
1281 of the zebrafish otic vesicle. *Development* **130**, 1403-1417.
- 1282 **Hammond, K. L., van Eeden, F. J. and Whitfield, T. T.** (2010). Repression of  
1283 Hedgehog signalling is required for the acquisition of dorsolateral cell fates in  
1284 the zebrafish otic vesicle. *Development* **137**, 1361-1371.
- 1285 **Hammond, K. L. and Whitfield, T. T.** (2011). Fgf and Hh signalling act on a  
1286 symmetrical pre-pattern to specify anterior and posterior identity in the  
1287 zebrafish otic placode and vesicle. *Development* **138**, 3977-3987.
- 1288 **Herbrand, H., Guthrie, S., Hadrys, T., Hoffmann, S., Arnold, H. H., Rinkwitz-  
1289 Brandt, S. and Bober, E.** (1998). Two regulatory genes, *cNkx5-1* and *cPax2*,  
1290 show different responses to local signals during otic placode and vesicle  
1291 formation in the chick embryo. *Development* **125**, 645-654.
- 1292 **Jao, L., Wente, S. and Chen, W.** (2013). Efficient multiplex biallelic zebrafish  
1293 genome editing using a CRISPR nuclease system. *Proc. Natl. Acad. Sci. USA*  
1294 **110**, 13904-13909.



- 1295 **Kimmel, C. B., Ballard, W. W., Kimmel, S. R., Ullmann, B. and Schilling, T. F.**  
1296 (1995). Stages of embryonic development of the zebrafish. *Dev. Dyn.* **203**,  
1297 253-310.
- 1298 **Kwak, S.-J., Phillips, B. T., Heck, R. and Riley, B. B.** (2002). An expanded domain  
1299 of *fgf3* expression in the hindbrain of zebrafish *valentino* mutants results in  
1300 mis-patterning of the otic vesicle. *Development* **129**, 5279-5287.
- 1301 **Kwak, S. J., Vemaraju, S., Moorman, S. J., Zeddies, D., Popper, A. N. and Riley,**  
1302 **B. B.** (2006). Zebrafish *pax5* regulates development of the utricular macula  
1303 and vestibular function. *Dev. Dyn.* **235**, 3026-3038.
- 1304 **Kwan, K., Fujimoto, E., Grabher, C., Mangum, B., Hardy, M., Campbell, D.,**  
1305 **Parant, J., Yost, H., Kanki, J. and Chien, C.** (2007). The Tol2kit: a multisite  
1306 gateway-based construction kit for Tol2 transposon transgenesis constructs.  
1307 *Dev. Dyn.* **236**, 3088-3099.
- 1308 **Labun, K., Montague, T., Gagnon, J., Thyme, S. and Valen, E.** (2016).  
1309 CHOPCHOP v2: a web tool for the next generation of CRISPR genome  
1310 engineering. *Nuc. Acids Res.* **44**, W272-276.
- 1311 **Lecaudey, V., Cakan-Akdogan, G., Norton, W. H. and Gilmour, D.** (2008).  
1312 Dynamic Fgf signaling couples morphogenesis and migration in the zebrafish  
1313 lateral line primordium. *Development* **135**, 2695-2705.
- 1314 **Léger, S. and Brand, M.** (2002). Fgf8 and Fgf3 are required for zebrafish ear  
1315 placode induction, maintenance and inner ear patterning. *Mech. Dev.* **119**,  
1316 91-108.
- 1317 **Maier, E. and Whitfield, T.** (2014). RA and FGF signalling are required in the  
1318 zebrafish otic vesicle to pattern and maintain ventral otic identities. *PLoS*  
1319 *Genetics* **10**, e1004858.
- 1320 **McCarroll, M. and Nechiporuk, A.** (2013). Fgf3 and Fgf10a work in concert to  
1321 promote maturation of the epibranchial placodes in zebrafish. *PLoS One* **8**,  
1322 e85087.
- 1323 **Miller, N., Nance, M., Wohler, E., Hoover-Fong, J., Lisi, E., Thomas, G. and**  
1324 **Pevsner, J.** (2009). Molecular (SNP) analyses of overlapping hemizygous  
1325 deletions of 10q25.3 to 10qter in four patients: evidence for HMX2 and HMX3  
1326 as candidate genes in hearing and vestibular function. *Am. J. Hum. Genet.*  
1327 **149A**, 669-680.
- 1328 **Millimaki, B. B., Sweet, E. M., Dhasan, M. S. and Riley, B. B.** (2007). Zebrafish  
1329 *atoh1* genes: classic proneural activity in the inner ear and regulation by Fgf  
1330 and Notch. *Development* **134**, 295-305.
- 1331 **Millimaki, B. B., Sweet, E. M. and Riley, B. B.** (2010). Sox2 is required for  
1332 maintenance and regeneration, but not initial development, of hair cells in the  
1333 zebrafish inner ear. *Dev. Biol.* **338**, 262-269.
- 1334 **Molina, G., Watkins, S. and Tsang, M.** (2007). Generation of FGF reporter  
1335 transgenic zebrafish and their utility in chemical screens. *BMC Dev. Biol.* **7**,  
1336 62.
- 1337 **Montague, T., Cruz, J., Gagnon, J., Church, G. and Valen, E.** (2014).  
1338 CHOPCHOP: a CRISPR/Cas9 and TALEN web tool for genome editing. *Nuc.*  
1339 *Acids Res.* **42**, W401-407.
- 1340 **Mowbray, C., Hammerschmidt, M. and Whitfield, T. T.** (2001). Expression of BMP  
1341 signalling pathway members in the developing zebrafish inner ear and lateral  
1342 line. *Mech. Dev.* **108**, 179-184.



- 1343 **Ohta, S., Wang, B., Mansour, S. and Schoenwolf, G.** (2016). BMP regulates  
1344 regional gene expression in the dorsal otocyst through canonical and non-  
1345 canonical intracellular pathways. *Development* **epub ahead of print**.
- 1346 **Padanad, M., Bhat, N., Guo, B. and Riley, B.** (2012). Conditions that influence the  
1347 response to Fgf during otic placode induction. *Dev. Biol.* **364**, 1-10.
- 1348 **Phillips, B. T., Bolding, K. and Riley, B. B.** (2001). Zebrafish *fgf3* and *fgf8* encode  
1349 redundant functions required for otic placode induction. *Dev. Biol.* **235**, 351-  
1350 365.
- 1351 **Radosevic, M., Robert-Moreno, A., Coolen, M., Bally-Cuif, L. and Alsina, B.**  
1352 (2011). Her9 represses neurogenic fate downstream of Tbx1 and retinoic acid  
1353 signaling in the inner ear. *Development* **138**, 397-408.
- 1354 **Raible, F. and Brand, M.** (2001). Tight transcriptional control of the ETS domain  
1355 factors Erm and Pea3 by Fgf signaling during early zebrafish development.  
1356 *Mech. Dev.* **107**, 105-117.
- 1357 **Rinkwitz-Brandt, S., Justus, M., Oldenettel, I., Arnold, H.-H. and Bober, E.**  
1358 (1995). Distinct temporal expression of mouse *Nkx-5.1* and *Nkx-5.2*  
1359 homeobox genes during brain and ear development. *Mech. Dev.* **52**, 371-381.
- 1360 **Roehl, H. and Nüsslein-Volhard, C.** (2001). Zebrafish *pea3* and *erm* are general  
1361 targets of FGF8 signalling. *Current Biology* **11**, 503-507.
- 1362 **Sangu, N., Okamoto, N., Shimojima, K., Ondo, Y., Nishikawa, M. and Yamamoto,**  
1363 **T.** (2016). A de novo microdeletion in a patient with inner ear abnormalities  
1364 suggests that the 10q26.13 region contains the responsible gene. *Hum.*  
1365 *Genome Var.* **3**, 16008.
- 1366 **Sapède, D. and Pujades, C.** (2010). Hedgehog signaling governs the development  
1367 of otic sensory epithelium and its associated innervation in zebrafish. *J.*  
1368 *Neurosci.* **30**, 3612-3623.
- 1369 **Schindelin, J., Arganda-Carreras, I., Frise, E., Kaynig, V., Longair, M., Pietzsch,**  
1370 **T., Preibisch, S., Rueden, C., Saalfeld, S., Schmid, B., et al.** (2012). Fiji: an  
1371 open-source platform for biological-image analysis. *Nat. Meth.* **9**, 676-682.
- 1372 **Schmid, B., Fürthauer, M., Connors, S. A., Trout, J., Thisse, B., Thisse, C. and**  
1373 **Mullins, M. C.** (2000). Equivalent genetic roles for *bmp7/snailhouse* and  
1374 *bmp2b/swirl* in dorsoventral pattern formation. *Development* **127**, 957-967.
- 1375 **Scholpp, S. and Brand, M.** (2004). Endocytosis controls spreading and effective  
1376 signaling range of Fgf8 protein. *Curr. Biol.* **14**, 1834-1841.
- 1377 **Sweet, E. M., Vemaraju, S. and Riley, B. B.** (2011). Sox2 and Fgf interact with  
1378 Atoh1 to promote sensory competence throughout the zebrafish inner ear.  
1379 *Dev. Biol.* **358**, 113-121.
- 1380 **Thisse, B. and Thisse, C.** (2004). Fast release clones: a high throughput expression  
1381 analysis. *ZFIN Direct Data Submission* (<http://zfin.org/>).
- 1382 **Thisse, C. and Thisse, B.** (2008). High-resolution in situ hybridization to whole-  
1383 mount zebrafish embryos. *Nat. Protoc.* **3**, 59-69.
- 1384 **Varga, Z. M., Amores, A., Lewis, K. E., Yan, Y. L., Postlethwait, J. H., Eisen, J. S.**  
1385 **and Westerfield, M.** (2001). Zebrafish *smoothed* functions in ventral neural  
1386 tube specification and axon tract formation. *Development* **128**, 3497-3509.
- 1387 **Wang, W., Chan, E. K., Baron, S., Van de Water, T. and Lufkin, T.** (2001). *Hmx2*  
1388 homeobox gene control of murine vestibular morphogenesis. *Development*  
1389 **128**, 5017-5029.

- 1390 **Wang, W., Grimmer, J. F., Van De Water, T. R. and T, L.** (2004). *Hmx2* and *Hmx3*  
1391 homeobox genes direct development of the murine inner ear and  
1392 hypothalamus and can be functionally replaced by *Drosophila Hmx*. *Dev. Cell*  
1393 **7**, 439-453.
- 1394 **Wang, W., Van De Water, T. and Lufkin, T.** (1998). Inner ear and maternal  
1395 reproductive defects in mice lacking the *Hmx3* homeobox gene. *Development*  
1396 **125**, 621-634.
- 1397 **Whitfield, T. T. and Hammond, K. L.** (2007). Axial patterning in the developing  
1398 vertebrate inner ear. *Int. J. Dev. Biol.* **51** (Special Issue: Ear Development),  
1399 507-520.
- 1400 **Wotton, K., Weierud, F., Juárez-Morales, J., Alvares, L., Dietrich, S. and Lewis,**  
1401 **K.** (2009). Conservation of gene linkage in dispersed vertebrate NK  
1402 homeobox clusters. *Dev. Genes Evol.* **219**, 481-496.
- 1403 **Zagorski, M., Tabata, Y., Brandenberg, N., Lutolf, M., Tkačik, G., Bollenbach, T.,**  
1404 **Briscoe, J. and Kicheva, A.** (2017). Decoding of position in the developing  
1405 neural tube from antiparallel morphogen gradients. *Science* **356**, 1379-1383.
- 1406 **Zou, J., Guo, Y., Guettouche, T., Smith, D. and Voellmy, R.** (1998). Repression of  
1407 heat shock transcription factor HSF1 activation by HSP90 (HSP90 complex)  
1408 that forms a stress-sensitive complex with HSF1. *Cell* **94**, 471-480.
- 1409

## Details of the mathematical model

### Representation of otic tissue

For the purposes of modelling gene expression in the developing otic tissue between 14 and 36 hours post fertilisation (hpf), we represent the medial side of the otic tissue as a one-dimensional array of cells. Distance along this array—represented by the variable  $x$ —is measured in percentage length along the anterior-posterior (AP) axis. At the stages studied, the length of the medial side is approximately  $100\mu\text{m}$ .

### Competence to express *fgf*

Our data suggest that competence to express *fgf* in the otic tissue ( $fgf_i$ ) begins at around 14 hpf (see Fig. 7B) and is strongest at the poles. We therefore assume that this competence can be represented by a function of the form

$$C(x, t) = \begin{cases} 0 & \text{if } t \leq 14 \text{ hpf,} \\ 0.15 + 0.85 \left( \frac{x_c^m}{x_c^m + x^m} + \frac{x_c^m}{x_c^m + (100 - x)^m} \right) & \text{if } t > 14 \text{ hpf,} \end{cases} \quad (1)$$

where  $0 \leq x \leq 100$  is percentage length along the AP axis,  $x_c$  is a measure of the extent of the polar competence regions, and  $m$  is a measure of the sharpness of the boundaries between regions of high and low competence. In our model simulations, we assume  $x_c = 20\%$  AP length and  $m = 5$ , giving the competence profile shown in Fig. S1A.

### Extrinsic Fgf expression

We assume that rhombomere 4 of the hindbrain acts as the main source of extrinsic Fgf signalling; both *fgf3* and *fgf8a* are expressed here at the time of initial otic anteroposterior patterning (Maves et al., 2002). Further support is provided by analysis of mutants for *mafba* (Kwak et al., 2002) and *hnf1ba* (Lecaudey et al., 2007). These two genes code for transcription factors expressed in the hindbrain and are required for restriction of *fgf3* expression to rhombomere 4. In the *mafba*<sup>-/-</sup> and *hnf1ba*<sup>-/-</sup> mutants, posterior expansions of *fgf3* expression in the hindbrain correlate with expansions or duplications of otic anterior markers similar to those we see in *Tg(hsp70:fgf3)* embryos after heat shock.

We assume that the extrinsic Fgf3 protein spreads away from the cells in which it is produced, resulting in a graded expression profile in the neighbouring otic tissue. In support of this, we show in Fig. 7 – Supplemental File 1 that a reporter of Fgf signalling activity is expressed in a decreasing gradient in the otic region, with highest activity in the tissue neighbouring rhombomere 4. Up to time  $t = 18$  hpf, we assume that the distribution of rhombomeric Fgf protein in the otic tissue is given by

$$F_r(x) = \begin{cases} F_0 & \text{if } x \leq x_0, \\ F_0 \exp(-(x - x_0)/\lambda_f) & \text{if } x > x_0, \end{cases} \quad (2)$$

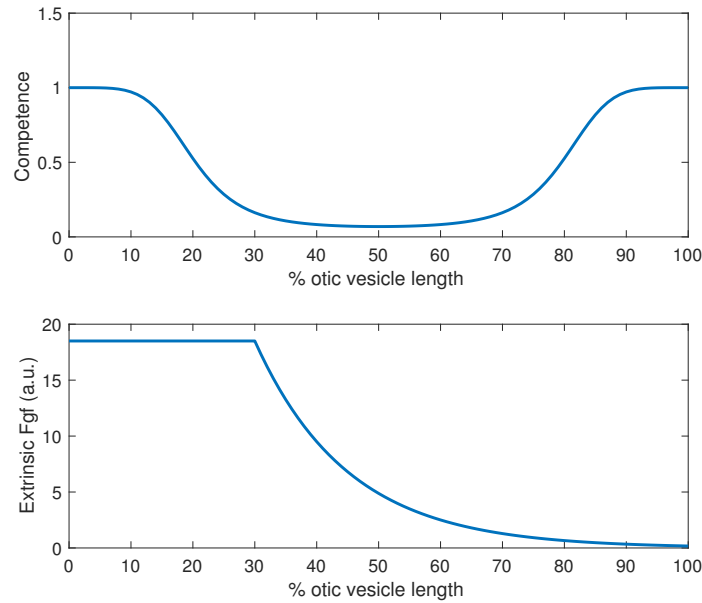

Figure S1: (A) Assumed distribution of competence for endogenous *fgf* expression in the otic tissue with  $x_c = 20\%$  AP length and  $m = 5$  (see Eq. (1)); (B) Assumed distribution (up until 18 hpf) in the otic tissue of Fgf protein produced in rhombomere 4 (see Eq. (2)).  $F_0 = 18.5$ ,  $x_0 = 30\%$  AP axis,  $\lambda_f = 15\%$  AP axis.

where  $F_r(x)$  is the Fgf protein concentration (in arbitrary units) in the otic tissue at AP position  $x$ ,  $0 \leq x \leq x_0$  is the region of overlap between rhombomere 4 and the otic tissue,  $F_0$  is the maximum protein concentration, and  $\lambda_f$  is the effective “diffusion wavelength” of Fgf. The resulting concentration profile is shown in Fig. S1B for  $F_0 = 18.5$ ,  $x_0 = 30\%$  AP axis, and  $\lambda_f = 15\%$  AP axis (approximately  $15 \mu\text{m}$  at the stages studied).

*fgf* expression in rhombomere 4 decreases significantly at around 18 hpf (Maves *et al.*, 2002). Up until this time, the Fgf concentration profile in the otic tissue is given by Eq. (2). At times later than 18 hpf, we assume linear degradation of the Fgf protein. The Fgf concentration at time  $t$  is therefore given by

$$F_e(x, t) = \begin{cases} F_r(x) & \text{if } t \leq 18 \text{ hpf,} \\ F_r(x) \exp(-(t - 18)/\tau_e) & \text{if } t > 18 \text{ hpf,} \end{cases} \quad (3)$$

where  $\tau_e$  is the half-life (in hours) of the Fgf protein.

### Regulated gene expression in the otic tissue

Fgf protein originating from rhombomere 4 initiates a temporal sequence of spatially patterned gene expression in the otic tissue. Based on the inferred interactions summarised in Fig. 7A, we represent transcription and translation using a system of coupled differential equations as follows:

$$\frac{\partial h_m}{\partial t} = k (f(F_t, R; \theta_1, \rho_1) + g(H_p; \theta_{10})) - \mu_1 h_m, \quad (4)$$

$$\frac{\partial H_p}{\partial t} = \kappa h_m - \nu_1 H_p, \quad (5)$$

$$\frac{\partial p_m}{\partial t} = k f(F_t, R; \theta_2, \rho_2) g(H_p; \theta_3) - \mu_2 p_m, \quad (6)$$

$$\frac{\partial f_{3m}}{\partial t} = C(x, t) k f(F_t, R; \theta_4, \rho_4) g(H_p; \theta_5) - \mu_4 f_{3m}, \quad (7)$$

$$\frac{\partial f_{8m}}{\partial t} = C(x, t) k f(F_t, R; \theta_6, \rho_6) [\beta_7 + g(H_p; \theta_7)] - \mu_6 f_{8m}, \quad (8)$$

$$\frac{\partial f_{10m}}{\partial t} = C(x, t) k f(F_t, R; \theta_8, \rho_8) [\beta_9 + g(H_p; \theta_9)] - \mu_8 f_{10m}, \quad (9)$$

$$\frac{\partial F_{3p}}{\partial t} = \kappa f_{3m} - \nu_2 F_{3p} + D \frac{\partial^2 F_{3p}}{\partial x^2}, \quad (10)$$

$$\frac{\partial F_{8p}}{\partial t} = \kappa f_{8m} - \nu_3 F_{8p} + D \frac{\partial^2 F_{8p}}{\partial x^2}, \quad (11)$$

$$\frac{\partial F_{10p}}{\partial t} = \kappa f_{10m} - \nu_4 F_{10p} + D \frac{\partial^2 F_{10p}}{\partial x^2}, \quad (12)$$

where

$$F_t = F_e + F_{3p} + F_{8p} + F_{10p} \quad (13)$$

represents the total amount of Fgf protein in the otic tissue and the transcription regulation functions are given by increasing sigmoid (Hill) functions of the general form:

$$f(F_t, R; \theta, \rho) = \frac{F_t^2}{(\theta + \rho R)^2 + F_t^2}, \quad (14)$$

$$g(H_p; \theta) = \frac{H_p^2}{\theta^2 + H_p^2}. \quad (15)$$

In these functions, the parameter  $\theta$  represents the activation threshold — the concentration of activator required to achieve a half-maximal rate of transcription. The effect of Hh attenuation is to increase the threshold in Eq. (14) by an amount  $\rho R$ , where  $R$  is a measure of the amount of Hh signalling in the otic tissue, and  $\rho$  is the relative attenuation strength for each gene. Hh attenuation thus reduces the rate of transcription resulting from a given concentration of Fgf.

The meaning of all model variables and parameters is summarised in Tables S1–S3.

In the model, expression of all genes is activated by the total amount of Fgf protein (both extrinsic and that produced within the otic tissue) and attenuated by Hh protein.

Expression of *hmx3a*, *pax5*, *fgf3*, *fgf8a* and *fgf10a* is additionally activated by Hmx3a protein.

| <i>Variable</i> | <i>Meaning</i>                      |
|-----------------|-------------------------------------|
| $h_m$           | <i>hmx3a</i> mRNA concentration     |
| $H_p$           | Hmx3a protein concentration         |
| $p_m$           | <i>pax5</i> mRNA concentration      |
| $f_{3m}$        | <i>fgf3</i> mRNA concentration      |
| $f_{8m}$        | <i>fgf8a</i> mRNA concentration     |
| $f_{10m}$       | <i>fgf10a</i> mRNA concentration    |
| $F_{3p}$        | Fgf3 protein concentration          |
| $F_{8p}$        | Fgf8a protein concentration         |
| $F_{10p}$       | Fgf10a protein concentration        |
| $F_e$           | Extrinsic Fgf protein concentration |
| $F_t$           | Total Fgf protein concentration     |
| $R$             | Hh protein concentration            |
| $C(x, t)$       | Competence to express <i>fgf</i>    |
| $F_e(x, t)$     | Extrinsic Fgf protein               |

Table S1: Definition of model variables

Simulations of the model were performed with the parameter values listed in Tables S2 and S3 on a discrete spatial domain comprising 100 spatial cells (with the diffusion terms in Eqs. (10)–(12) represented by a simple finite difference scheme), with zero-flux boundary conditions at the anterior and posterior poles of the otic vesicle. Simulations covered the time period 10–36 hpf, with initial values of all intrinsic mRNA and protein variables set to zero. The resulting spatiotemporal mRNA expression patterns are shown in Fig. 8, for three conditions: wild type (1st column), heat shock induction of *fgf3* (2nd column), and inhibition of Hh signalling by cyclopamine treatment (3rd column). The simulation protocols for the latter two conditions are described below. Fig. S2 shows the spatial profiles of mRNA and total Fgf protein expression for the three conditions at 22.5 hpf and 36 hpf.

Transcription and translation rates for all endogenous genes and proteins have been set to 1, so all expression levels are expressed in arbitrary units. Half-lives of mRNA and protein have been set to reflect the observed dynamics of expression patterns. For example, the *pax5* mRNA half life is set to be low (0.5 hrs) to reflect the fact that *pax5* mRNA expression induced in the middle part of the otic vesicle by heat shock Fgf3 protein is lost by 36 hpf. The *hmx3a* mRNA half life is also set to be low (0.5 hrs) to reflect the early onset of *hmx3a* expression. In contrast, the *fgf* mRNA half lives are set to be higher to reflect the later onset of their expression. The Fgf protein diffusion coefficient is set to be low in order to avoid Fgf protein produced in the anterior and posterior poles “flooding” the otic vesicle. The short half lives of the Fgf proteins also contribute to the restriction of Fgf proteins to the poles. Indeed, Fgf protein diffusion can be omitted from the model



without affecting the dynamics of the mRNA expression patterns.

The transcription regulation parameters, which reflect the level of expression at which regulating proteins effect regulation of their targets, were chosen with reference to the expression levels achieved by each protein in the model (shown in Fig. S3). For example, the threshold for regulation of *hmx3a* expression by Fgf protein ( $\theta_1$ ) is the primary determinant of the extent of the anterior expression domain of *hmx3a* mRNA.

| <i>Parameter</i> | <i>Value</i>                       | <i>Description</i>                        |
|------------------|------------------------------------|-------------------------------------------|
| $k$              | 1 a.u. per hr                      | Maximum transcription rate                |
| $\kappa$         | 1 a.u. per mRNA per hr             | Translation rate                          |
| $k_{HS}$         | 100 a.u. per hr                    | <i>fgf3</i> heat shock transcription rate |
| $\mu_1$          | $\ln 2/0.5 \text{ hr}^{-1}$        | <i>hmx3a</i> degradation rate             |
| $\mu_2$          | $\ln 2/0.5 \text{ hr}^{-1}$        | <i>pax5</i> degradation rate              |
| $\mu_4$          | $\ln 2/3 \text{ hr}^{-1}$          | <i>fgf3</i> degradation rate              |
| $\mu_6$          | $\ln 2/6 \text{ hr}^{-1}$          | <i>fgf8a</i> degradation rate             |
| $\mu_8$          | $\ln 2/4 \text{ hr}^{-1}$          | <i>fgf10a</i> degradation rate            |
| $\nu_1$          | $\ln 2/1.5 \text{ hr}^{-1}$        | Hmx3a degradation rate                    |
| $\nu_2$          | $\ln 2/0.5 \text{ hr}^{-1}$        | Fgf3 degradation rate                     |
| $\nu_3$          | $\ln 2/0.5 \text{ hr}^{-1}$        | Fgf8a degradation rate                    |
| $\nu_4$          | $\ln 2/0.5 \text{ hr}^{-1}$        | Fgf10a degradation rate                   |
| $D$              | $50 \mu\text{m}^2 \text{ hr}^{-1}$ | Fgf diffusion coefficient                 |
| $F_0$            | 18.5                               | Extrinsic Fgf amount (a.u.)               |
| $R$              | 15                                 | Hh attenuation strength                   |

Table S2: Production, degradation and diffusion parameters

### Simulation of heat shock induction of *fgf3a* expression and cyclopamine treatment

To simulate heat shock induction of *fgf3* expression, we include additional variables to represent *fgf3* mRNA and Fgf3 protein produced from the *fgf3* transgene. We assume that transcription from the transgene starts at 14 hpf and terminates at 14.5 hpf.

Because of the time taken for the resulting mRNA and protein to decay, the effects of the heat shock on target gene expression extend beyond 14.5 hpf.

To simulate treatment of embryos with cyclopamine (a chemical inhibitor of Hh signalling) at 14 hpf, we assume that a consequent reduction in the Hh-dependent antagonism of Fgf-dependent transcription (the variable  $R$  in the model equations) does not begin until 15 hpf. In this way, we represent the time taken for a reduction in Hh signalling to feed through to a reduction in the intracellular effectors of Hh signalling. We further assume that the inhibitory term  $R$  decays exponentially for  $t > 15$  hpf, with a half-life of 3 hrs.

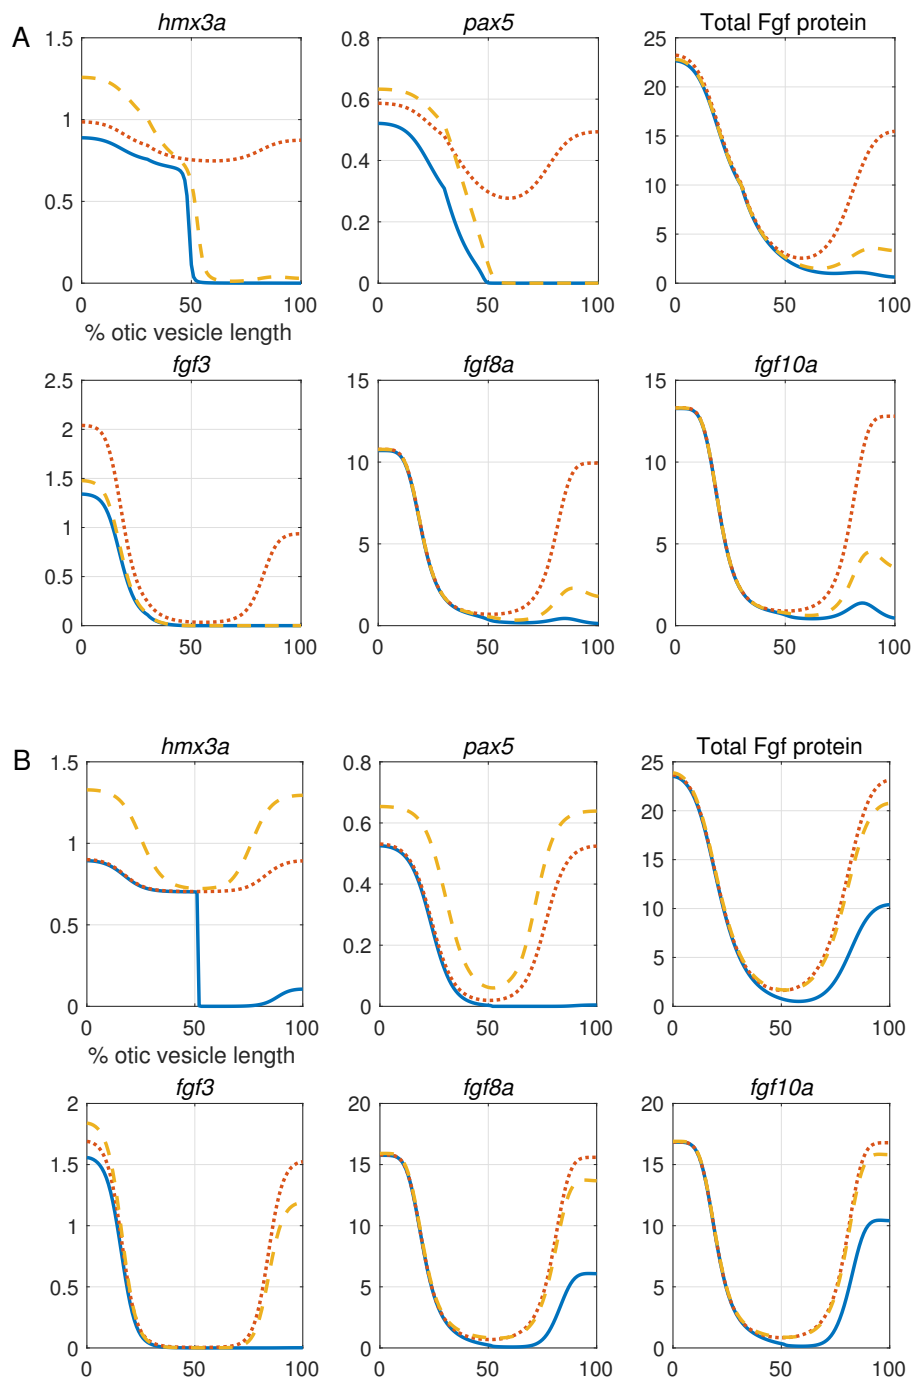

Figure S2: Spatial expression profiles of model variables at 22.5 hpf (A) and 36 hpf (B). In each panel, the solid blue curve represents the wild type, the dotted red line represents heat shock induction of *fgf3*, and the dashed orange line represents cyclopamine treatment (inhibition of Hh signalling). mRNA profiles (*hmx3a*, *pax5*, *fgf3*, *fgf8a*, *fgf10a*) are measured as transcripts per cell; Fgf protein is measured as protein molecules per cell, and “Total Fgf protein” represents  $F_t$  — the sum of all Fgf proteins (intrinsic and extrinsic).

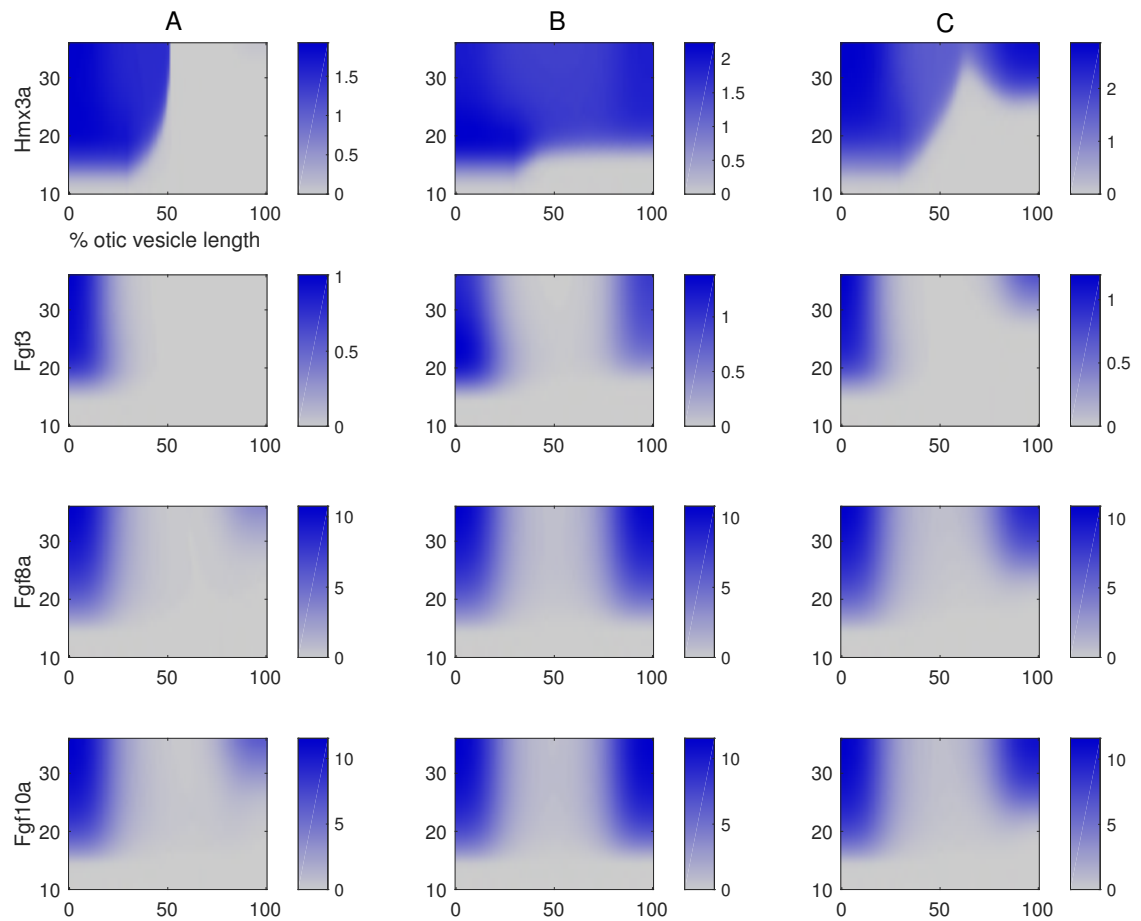

Figure S3: Spatio-temporal expression profiles of Hmx3a, Fgf3, Fgf8a and Fgf10a protein model variables in simulations of wild type (column A), heat shock induction of *fgf3* (column B), and cyclopamine treatment (column C)

| <i>Parameter</i> | <i>Value</i> | <i>Description</i>                                     |
|------------------|--------------|--------------------------------------------------------|
| $\theta_1$       | 10           | Fgf- <i>hmx3a</i> threshold                            |
| $\theta_2$       | 5            | Fgf- <i>pax5</i> threshold                             |
| $\theta_3$       | 0.68         | Hmx3a- <i>pax5</i> threshold                           |
| $\theta_4$       | 25           | Fgf- <i>fgf3</i> threshold                             |
| $\theta_5$       | 0.83         | Hmx3a- <i>fgf3</i> threshold                           |
| $\theta_6$       | 1            | Fgf- <i>fgf8a</i> threshold                            |
| $\theta_7$       | 0.06         | Hmx3a- <i>fgf8a</i> threshold                          |
| $\theta_8$       | 1            | Fgf- <i>fgf10a</i> threshold                           |
| $\theta_9$       | 0.04         | Hmx3a- <i>fgf10a</i> threshold                         |
| $\theta_{10}$    | 0.25         | Hmx3a- <i>hmx3a</i> threshold                          |
| $\rho_1$         | 2            | Hh- <i>hmx3a</i> attenuation coefficient               |
| $\rho_2$         | 0.4          | Hh- <i>pax5</i> attenuation coefficient                |
| $\rho_4$         | 0.1          | Hh- <i>fgf3</i> attenuation coefficient                |
| $\rho_6$         | 0.1          | Hh- <i>fgf8a</i> attenuation coefficient               |
| $\rho_8$         | 0.05         | Hh- <i>fgf10a</i> attenuation coefficient              |
| $\beta_7$        | 1            | Hmx3a-independent <i>fgf8a</i> production coefficient  |
| $\beta_9$        | 2            | Hmx3a-independent <i>fgf10a</i> production coefficient |

Table S3: Transcription regulation parameters

## References

**Kwak, S.-J., Phillips, B. T., Heck, R. and Riley, B. B.** (2002). An expanded domain of *fgf3* expression in the hindbrain of zebrafish *valentino* mutants results in mis-patterning of the otic vesicle. *Development* **129**, 5279–5287.

**Lecaudey, V., Ulloa, E., Anselme, I., Stedman, A., Schneider-Maunoury, S. and Pujades, C.** (2007). Role of the hindbrain in patterning the otic vesicle: A study of the zebrafish *vhnf1* mutant. *Dev. Biol.* **303**, 134–143.

**Maves, L., Jackman, W. and Kimmel, C. B.** (2002). FGF3 and FGF8 mediate a rhombomere 4 signaling activity in the zebrafish hindbrain. *Development* **129**, 3825–3837.
